# Supplementary material
Source: PubMed Central journal article supplement (PMC8276254)
Supplement: NIHMS1062475-supplement-sm1.pdf [file NIHMS1062475-supplement-sm1.pdf]

Salmonella was labeled or not (as the control) with the aminoxy probe, and then lysated. The proteins from the lysate were isolated by NeutrAvidin beads for mass spectrometric analysis.

| Column Name | Comments                                                                |                                                           |          |        |        |        |          |         |         |
|-------------|-------------------------------------------------------------------------|-----------------------------------------------------------|----------|--------|--------|--------|----------|---------|---------|
| ID          | Protein ID in UNIPROT database                                          |                                                           |          |        |        |        |          |         |         |
| GeneName    | Gene name in UNIPROT database                                           |                                                           |          |        |        |        |          |         |         |
| Description | Protein name in UNIPROT database                                        |                                                           |          |        |        |        |          |         |         |
| iBAQ        | iBAQ value of identified proteins in all samples                        |                                                           |          |        |        |        |          |         |         |
| Con1        | iBAQ value of identified proteins in control sample, technical repeat 1 |                                                           |          |        |        |        |          |         |         |
| Con2        | iBAQ value of identified proteins in control sample, technical repeat 2 |                                                           |          |        |        |        |          |         |         |
| Con3        | iBAQ value of identified proteins in control sample, technical repeat 3 |                                                           |          |        |        |        |          |         |         |
| Lab1        | iBAQ value of identified proteins in labeled sample, technical repeat 1 |                                                           |          |        |        |        |          |         |         |
| Lab2        | iBAQ value of identified proteins in labeled sample, technical repeat 2 |                                                           |          |        |        |        |          |         |         |
| Lab3        | iBAQ value of identified proteins in labeled sample, technical repeat 3 |                                                           |          |        |        |        |          |         |         |
| ID          | GeneName                                                                | Description                                               | iBAQ     | Con1   | Con2   | Con3   | Lab1     | Lab2    | Lab3    |
| 6PGD SALTY  | gnd                                                                     | 6-phosphogluconate dehydrogenase, decarboxylating         | 1812100  |        |        |        | 651580   | 691940  | 468570  |
| 6PGL SALTY  | pgl                                                                     | 6-phosphogluconolactonase                                 | 2932900  | 2978.9 |        | 2471   | 637530   | 1022200 | 1267700 |
| AAS SALTY   | aas                                                                     | Bifunctional protein Aas                                  | 451790   |        |        |        | 117750   | 86401   | 247630  |
| AAT SALTY   | aspC                                                                    | Aspartate aminotransferase                                | 12210000 | 13877  | 2991.3 | 13778  | 4775200  | 3678100 | 3726300 |
| ABDH SALTY  | prr                                                                     | Gamma-aminobutyraldehyde dehydrogenase                    | 10567000 |        |        |        | 3682900  | 2882000 | 4001900 |
| ACEA SALTY  | aceA                                                                    | Isocitrate lyase                                          | 3714500  |        |        |        | 1305500  | 1428100 | 980880  |
| ACKA SALTY  | ackA                                                                    | Acetate kinase                                            | 9594000  |        |        |        | 2441800  | 2415400 | 4736800 |
| ACNA SALTY  | acnA                                                                    | Aconitate hydratase A                                     | 13973000 | 14088  | 8358.2 | 9802.4 | 5323900  | 4442200 | 4174600 |
| ACNB SALTY  | acnB                                                                    | Aconitate hydratase B                                     | 12824000 | 10871  | 7580.6 | 14045  | 4509700  | 4261000 | 4020800 |
| ACP SALTY   | acpP                                                                    | Acyl carrier protein                                      | 22766000 | 236090 | 195810 | 211940 | 10273000 | 5274800 | 6574000 |
| ACSA SALTY  | acs                                                                     | Acetyl-coenzyme A synthetase                              | 8561400  |        |        | 31796  | 2529400  | 2467600 | 3532700 |
| ADD SALTY   | add                                                                     | Adenosine deaminase                                       | 249070   |        |        |        | 84139    | 81289   | 83644   |
| AGP SALTY   | agp                                                                     | Glucose-1-phosphatase                                     | 925840   |        |        |        | 307480   | 320310  | 298050  |
| AHPC SALTY  | ahpC                                                                    | Alkyl hydroperoxide reductase C                           | 2921200  |        |        |        | 1231700  | 913400  | 776100  |
| AHPF SALTY  | ahpF                                                                    | Alkyl hydroperoxide reductase subunit F                   | 654210   | 91635  | 111780 |        | 109300   | 130770  | 210720  |
| ALR2 SALTY  | dadX                                                                    | Alanine racemase, catabolic                               | 369770   |        |        |        | 77867    | 168810  | 123090  |
| AMPA SALTY  | pepA                                                                    | Probable cytosol aminopeptidase                           | 8382700  |        |        |        | 3729000  | 2213600 | 2440100 |
| APBE SALTY  | apbE                                                                    | FAD:protein FMN transferase                               | 100110   |        |        |        | 36372    | 27316   | 36418   |
| ARCA SALTY  | arcA                                                                    | Arginine deiminase                                        | 1987900  |        |        |        | 782860   | 407840  | 797240  |
| ARNA SALTY  | arnA                                                                    | Bifunctional polymyxin resistance protein ArnA            | 4364300  |        |        | 1748.4 | 1673000  | 997440  | 1692100 |
| ARNB SALTY  | arnB                                                                    | UDP-4-amino-4-deoxy-L-arabinose--oxoglutarate aminotransf | 4424100  |        |        |        | 1713300  | 1159600 | 1551100 |
| ARNC SALTY  | arnC                                                                    | Undecaprenyl-phosphate 4-deoxy-4-formamido-L-arabinose tr | 10701000 | 9907.5 |        |        | 4342800  | 3980500 | 2367400 |

|             |      |                                                          |           |         |         |         |          |          |          |
|-------------|------|----------------------------------------------------------|-----------|---------|---------|---------|----------|----------|----------|
| ARNT SALTY  | arnT | Undecaprenyl phosphate-alpha-4-amino-4-deoxy-L-arabinose | 106450    | 71441   | 35005   |         |          |          |          |
| ARO A SALTY | aroA | 3-phosphoshikimate 1-carboxyvinyltransferase             | 403600    | 31310   |         | 2700.5  | 125310   | 90261    | 154020   |
| ARO B SALTY | aroB | 3-dehydroquinate synthase                                | 4172000   |         |         | 335280  | 1259000  | 663190   | 1914600  |
| ASTA SALTY  | astA | Arginine N-succinyltransferase                           | 149120    |         | 59398   | 89717   |          |          |          |
| ASTD SALTY  | astD | N-succinylglutamate 5-semialdehyde dehydrogenase         | 711700    |         |         |         | 278870   | 239320   | 193510   |
| ATP6 SALTY  | atpB | ATP synthase subunit a                                   | 6927600   |         |         |         | 4918900  | 2008700  |          |
| ATP A SALTY | atpA | ATP synthase subunit alpha                               | 25651000  | 123010  | 79289   | 106450  | 8827900  | 7771800  | 8742500  |
| ATP B SALTY | atpD | ATP synthase subunit beta                                | 13227000  |         | 2674.6  |         | 4363500  | 4551000  | 4309900  |
| ATP F SALTY | atpF | ATP synthase subunit b                                   | 1444400   |         |         |         | 444650   | 597550   | 402190   |
| ATP G SALTY | atpG | ATP synthase gamma chain                                 | 1335500   |         |         |         | 153810   | 527660   | 654030   |
| ATP L SALTY | atpE | ATP synthase subunit c                                   | 90294000  | 1158500 |         | 1186800 | 27615000 | 26924000 | 33410000 |
| BAMA SALTY  | bamA | Outer membrane protein assembly factor BamA              | 1743700   |         |         |         | 619740   | 518560   | 605360   |
| BAMB SALTY  | bamB | Outer membrane protein assembly factor BamB              | 1511500   |         |         |         | 381480   | 494730   | 635270   |
| BAME SALTY  | bamE | Outer membrane protein assembly factor BamE              | 1735400   |         |         |         | 984100   | 455090   | 296250   |
| BASR SALTY  | basR | Transcriptional regulatory protein BasR                  | 13659000  |         |         |         | 3681400  | 1431400  | 8546200  |
| BCSB SALTY  | bcsB | Cyclic di-GMP-binding protein                            | 377250    |         |         |         | 120010   | 154930   | 102310   |
| BCSE SALTY  | bcsE | Cyclic di-GMP binding protein BcsE                       | 87150     |         |         |         | 22888    | 33957    | 30305    |
| BFR SALTY   | bfr  | Bacterioferritin                                         | 22923000  |         |         |         | 8344900  | 6060100  | 8518100  |
| BGLX SALTY  | bglX | Periplasmic beta-glucosidase                             |           |         |         |         |          |          |          |
| BIRA SALTY  | birA | Bifunctional ligase/repressor BirA                       | 2727900   | 771410  | 1100800 | 855710  |          |          |          |
| BTUR SALTY  | btuR | Cob(D)yrinic acid a,c-diamide adenosyltransferase        | 248060    |         |         |         | 58156    | 97188    | 92716    |
| C562 SALTY  | cybC | Soluble cytochrome b562                                  | 3146800   |         |         |         | 1513000  | 749090   | 884780   |
| CAPP SALTY  | ppc  | Phosphoenolpyruvate carboxylase                          | 7294100   | 2384.6  | 2614.8  |         | 2516500  | 2621100  | 2151500  |
| CBIF SALTY  | cbiF | Cobalt-precorrin-4 C(11)-methyltransferase               | 1650500   |         |         |         | 774410   | 363470   | 512660   |
| CBIH SALTY  | cbiH | Probable cobalt-factor III C(17)-methyltransferase       | 736610    |         |         |         | 243590   | 235270   | 257760   |
| CBIL SALTY  | cbiL | Cobalt-precorrin-2 C(20)-methyltransferase               | 943730    |         |         |         | 417350   | 260460   | 265930   |
| CBPA SALTY  | cbpA | Curved DNA-binding protein                               | 645860    |         |         |         | 175540   | 229230   | 241080   |
| CCA SALTY   | cca  | Multifunctional CCA protein                              | 662680    |         |         |         | 307260   | 156590   | 198830   |
| CDH SALTY   | cdh  | CDP-diacylglycerol pyrophosphatase                       | 6886600   |         | 17763   | 19821   | 2622400  | 1864800  | 2361900  |
| CH10 SALTY  | groS | 10 kDa chaperonin                                        | 70287000  | 1222200 | 632180  | 716500  | 37312000 | 15161000 | 15242000 |
| CH60 SALTY  | groL | 60 kDa chaperonin                                        | 27033000  | 403220  | 516810  | 775570  | 7945500  | 8079600  | 9312100  |
| CHEA SALTY  | cheA | Chemotaxis protein CheA                                  | 2912000   |         |         |         | 1103800  | 747660   | 1060500  |
| CHER SALTY  | cheR | Chemotaxis protein methyltransferase                     | 76440     |         |         |         | 30795    | 18750    | 26895    |
| CHEW SALTY  | cheW | Chemotaxis protein CheW                                  | 36651000  | 266140  | 252580  | 133470  | 12025000 | 14094000 | 9880100  |
| CISY SALTY  | gltA | Citrate synthase                                         | 114140000 | 201830  | 149270  | 488260  | 31275000 | 40686000 | 41345000 |
| CLPB SALTY  | clpB | Chaperone protein ClpB                                   | 8353800   |         | 14552   |         | 2963300  | 2804900  | 2571100  |
| CLPP SALTY  | clpP | ATP-dependent Clp protease proteolytic subunit           | 4116900   |         |         | 364140  | 493690   | 2635400  | 623690   |
| CLPX SALTY  | clpX | ATP-dependent Clp protease ATP-binding subunit ClpX      | 407200    |         |         |         | 150030   | 94017    | 163150   |
| CLSA SALTY  | clsA | Cardiolipin synthase A                                   | 212540    |         |         |         | 73672    | 46681    | 92189    |

|            |       |                                                                    |          |          |          |          |          |          |          |
|------------|-------|--------------------------------------------------------------------|----------|----------|----------|----------|----------|----------|----------|
| CMOB SALTY |       | tRNA U34 carboxymethyltransferase                                  | 512570   |          |          |          | 347720   | 88198    | 76649    |
| CORA SALTY | corA  | Magnesium transport protein CorA                                   | 1741900  |          |          |          | 1301200  | 334550   | 106190   |
| CPDB SALTY | cpdB  | 2',3'-cyclic-nucleotide 2'-phosphodiesterase/3'-nucleotidase       | 308180   | 63278    | 58149    | 55215    | 68370    | 34737    | 28432    |
| CPTA SALTY | cptA  | Phosphoethanolamine transferase CptA                               | 273960   |          |          |          | 54580    | 69767    | 149610   |
| CRA SALTY  | cra   | Catabolite repressor/activator                                     | 2827000  |          |          |          | 1143600  | 874350   | 809010   |
| CRP SALTY  | crp   | cAMP-activated global transcriptional regulator CRP                | 10000000 | 25340    | 10848    | 8452     | 3586400  | 3202200  | 3166800  |
| CSID SALTY | csiD  | Protein CsiD                                                       | 621220   |          |          |          | 231990   | 163530   | 225710   |
| CSPC SALTY | cspC  | Cold shock-like protein CspC                                       | 826690   |          |          |          | 452910   |          | 373790   |
| CSRA SALTY | csrA  | Translational regulator CsrA                                       | 3562900  |          |          |          | 1232500  | 1331700  | 998660   |
| CUEO SALTY | cueO  | Blue copper oxidase CueO                                           | 286280   |          |          |          | 90647    | 81469    | 114170   |
| CYSB SALTY | cysB  | HTH-type transcriptional regulator CysB                            | 322750   |          |          |          | 167550   | 61743    | 93458    |
| CYSE SALTY | cysE  | Serine acetyltransferase                                           | 4224000  | 9595.3   |          |          | 1717100  | 1018900  | 1478300  |
| CYSG SALTY | cysG  | Siroheme synthase                                                  | 2257200  |          |          |          | 743590   | 771410   | 742180   |
| CYSI SALTY | cysI  | Sulfite reductase [NADPH] hemoprotein beta-component               | 63049    |          |          |          | 28142    | 17172    | 17735    |
| CYSK SALTY | cysK  | Cysteine synthase A                                                | 3688300  |          |          |          | 1577700  | 914700   | 1195900  |
| CYSQ SALTY | cysQ  | 3'(2'),5'-bisphosphate nucleotidase CysQ                           | 830210   |          |          |          | 309370   | 333990   | 186850   |
| DADA SALTY | dadA  | D-amino acid dehydrogenase                                         | 13209000 | 40921    |          |          | 3860900  | 3541000  | 5766100  |
| DAPA SALTY | dapA  | 4-hydroxy-tetrahydrodipicolinate synthase                          | 10843000 |          |          |          | 3444900  | 2677500  | 4720100  |
| DAPB SALTY | dapB  | 4-hydroxy-tetrahydrodipicolinate reductase                         | 553580   |          |          |          | 102530   | 225140   | 225910   |
| DAPD SALTY | dapD  | 2,3,4,5-tetrahydropyridine-2,6-dicarboxylate N-succinyltransferase | 5897200  | 67251    | 74917    | 70205    | 1934200  | 1829200  | 1921500  |
| DBHA SALTY | hupA  | DNA-binding protein HU-alpha                                       | 26888000 | 1047400  | 898770   | 2290600  | 8685900  | 3056000  | 10909000 |
| DBHB SALTY | hupB  | DNA-binding protein HU-beta                                        | 1042900  |          |          |          | 366160   | 404340   | 272380   |
| DCD SALTY  | dcd   | dCTP deaminase                                                     | 976400   | 10201    | 43286    | 9002     | 300160   | 307370   | 306380   |
| DCOA SALTY | oadA2 | Oxaloacetate decarboxylase alpha chain                             | 67194000 | 28722000 | 23280000 | 15113000 | 67748    |          | 10826    |
| DCP SALTY  | dcp   | Dipeptidyl carboxypeptidase                                        | 938400   |          |          |          | 168910   | 121830   | 647660   |
| DCTA SALTY | dctA  | Aerobic C4-dicarboxylate transport protein                         | 766020   |          |          |          | 551020   | 123290   | 91717    |
| DDLA SALTY | ddlA  | D-alanine--D-alanine ligase A                                      | 87545    |          |          |          | 28050    | 32344    | 27151    |
| DEF SALTY  | def   | Peptide deformylase                                                | 5940900  |          |          |          | 2483600  | 1209500  | 2247800  |
| DEGP SALTY | degP  | Periplasmic serine endoprotease DegP                               | 51301    |          |          |          | 14359    | 18229    | 18714    |
| DEOB SALTY | deoB  | Phosphopentomutase                                                 | 5026600  |          | 15516    | 8190     | 1941000  | 1628900  | 1432900  |
| DEOC SALTY | deoC  | Deoxyribose-phosphate aldolase                                     | 1076400  |          |          |          | 214490   | 163310   | 698620   |
| DEOD SALTY | deoD  | Purine nucleoside phosphorylase DeoD-type                          | 24855000 | 136620   | 104180   | 54548    | 4238800  | 9332900  | 10988000 |
| DER SALTY  | der   | GTPase Der                                                         | 5429100  |          |          |          | 1759800  | 1938300  | 1731000  |
| DGAE SALTY | dgaE  | D-glucosamine-6-phosphate ammonia lyase                            | 417840   | 148550   | 223800   |          | 22468    | 23028    |          |
| DGTP SALTY | dgt   | Deoxyguanosinetriphosphate triphosphohydrolase                     | 803810   |          |          |          | 251880   | 276090   | 275840   |
| DHAS SALTY | asd   | Aspartate-semialdehyde dehydrogenase                               | 2012200  |          |          |          | 194420   | 397780   | 1420000  |
| DHE4 SALTY | gdhA  | NADP-specific glutamate dehydrogenase                              | 411070   |          |          |          | 161390   | 105940   | 143730   |
| DHSC SALTY | sdhC  | Succinate dehydrogenase cytochrome b556 subunit                    | 51586000 | 275990   | 412630   | 314600   | 17704000 | 11850000 | 21029000 |
| DJLA SALTY | djlA  | Co-chaperone protein DjLA                                          | 153880   |          |          |          | 104910   | 48975    |          |

|             |      |                                                       |           |         |         |         |       |           |          |          |
|-------------|------|-------------------------------------------------------|-----------|---------|---------|---------|-------|-----------|----------|----------|
| DKGA SALTY  | dkgA | 2,5-diketo-D-gluconic acid reductase A                | 1177200   | 8601.8  |         |         | 13389 | 424510    | 347550   | 383140   |
| DKSA SALTY  | dksA | RNA polymerase-binding transcription factor DksA      | 1297200   |         |         |         |       | 330650    | 437420   | 529140   |
| DLHH SALTY  | ysgA | Putative carboxymethylenebutenolidase                 | 480060    |         |         |         |       | 163570    | 157710   | 158780   |
| DNAA SALTY  | dnaA | Chromosomal replication initiator protein DnaA        | 119980    |         |         |         |       | 45099     | 32969    | 41911    |
| DNAJ SALTY  | dnaJ | Chaperone protein DnaJ                                | 1091700   |         |         | 70304   | 47756 | 368020    | 341750   | 263890   |
| DNAK SALTY  | dnaK | Chaperone protein DnaK                                | 5261100   | 6119.6  | 72786   | 11941   |       | 1746800   | 1078500  | 2344900  |
| DNLJ SALTY  | ligA | DNA ligase                                            | 1927800   |         |         |         |       | 845520    | 483180   | 599140   |
| DPO1 SALTY  | polA | DNA polymerase I                                      | 3156500   | 2733.3  |         | 4184.6  |       | 912080    | 1034700  | 1202800  |
| DPO3B SALTY | dnaN | Beta sliding clamp                                    | 1439300   | 9648.7  | 11981   |         |       | 523430    | 467160   | 427120   |
| DPS SALTY   | dps  | DNA protection during starvation protein              | 24878000  | 76654   |         | 29420   |       | 10750000  | 6964800  | 7057300  |
| DSBA SALTY  | dsbA | Thiol:disulfide interchange protein DsbA              | 392340    |         |         |         |       | 152310    | 125060   | 114970   |
| DTNK SALTY  | dtnK | D-threonate kinase                                    | 533240    | 117130  | 210110  | 181690  |       |           | 8861.4   | 15448    |
| DXS SALTY   | dxs  | 1-deoxy-D-xylulose-5-phosphate synthase               | 1641000   |         |         |         |       | 409520    | 420290   | 811230   |
| E4PD SALTY  | epd  | D-erythrose-4-phosphate dehydrogenase                 | 505010    |         |         |         |       | 171200    | 113910   | 219900   |
| EFG SALTY   | fusA | Elongation factor G                                   | 39994000  | 681790  | 296710  | 581800  |       | 13093000  | 12156000 | 13185000 |
| EFP SALTY   | efp  | Elongation factor P                                   | 323410    |         |         |         |       | 122480    | 100580   | 100350   |
| EFTS SALTY  | tsf  | Elongation factor Ts                                  | 9000200   | 311750  | 247490  | 139300  |       | 3072000   | 2650900  | 2578700  |
| EFTU SALTY  | tufB | Elongation factor Tu                                  | 262950000 | 5484100 | 5366100 | 5222100 |       | 106790000 | 63515000 | 76578000 |
| ENGB SALTY  | engB | Probable GTP-binding protein EngB                     | 155750    |         |         |         |       | 32097     | 83581    | 40073    |
| ENO SALTY   | eno  | Enolase                                               | 9978900   |         |         |         | 25306 | 3159300   | 3603700  | 3190600  |
| ERA SALTY   | era  | GTPase Era                                            | 1241000   |         |         |         |       | 388710    | 292520   | 559810   |
| EUTB SALTY  | eutB | Ethanolamine ammonia-lyase heavy chain                | 755920    |         |         |         |       | 342140    | 249410   | 164370   |
| EUTQ SALTY  | eutQ | Ethanolamine utilization protein EutQ                 | 117560    | 26218   |         |         | 91338 |           |          |          |
| EX3 SALTY   | xthA | Exodeoxyribonuclease III                              | 195520    |         |         |         |       | 44878     | 71953    | 78692    |
| EX7L SALTY  | xseA | Exodeoxyribonuclease 7 large subunit                  | 287400    |         |         | 1582.2  |       | 247690    | 22780    | 15353    |
| F16PA SALTY | fbp  | Fructose-1,6-bisphosphatase class 1                   | 27313000  | 97115   | 54276   | 78244   |       | 9691900   | 8272700  | 9118500  |
| FABA SALTY  | fabA | 3-hydroxydecanoyl-[acyl-carrier-protein] dehydratase  | 41205000  | 284610  | 306720  | 314210  |       | 14343000  | 13013000 | 12944000 |
| FABD SALTY  | fabD | Malonyl CoA-acyl carrier protein transacylase         | 680740    |         |         |         |       | 336630    | 266730   | 77385    |
| FABG SALTY  | fabG | 3-oxoacyl-[acyl-carrier-protein] reductase FabG       | 1642500   |         |         |         |       | 463840    | 617230   | 561430   |
| FABI SALTY  | fabI | Enoyl-[acyl-carrier-protein] reductase [NADH] FabI    | 9695300   | 30433   | 85729   | 37052   |       | 3107300   | 3023200  | 3411600  |
| FABZ SALTY  | fabZ | 3-hydroxyacyl-[acyl-carrier-protein] dehydratase FabZ | 11028000  | 151670  | 83534   |         |       | 1860300   | 4002200  | 4930100  |
| FADA SALTY  | fadA | 3-ketoacyl-CoA thiolase                               | 26351     |         |         |         |       | 7921.1    | 6453     | 11977    |
| FADB SALTY  | fadB | Fatty acid oxidation complex subunit alpha            | 2157300   |         |         |         |       | 828220    | 589610   | 739490   |
| FADE SALTY  | fadE | Acyl-coenzyme A dehydrogenase                         | 663880    | 258040  |         | 6919.5  |       | 43832     | 147000   | 208090   |
| FADI SALTY  | fadI | 3-ketoacyl-CoA thiolase                               |           |         |         |         |       |           |          |          |
| FADJ SALTY  | fadJ | Fatty acid oxidation complex subunit alpha            | 663070    |         |         |         |       | 289210    | 91994    | 281860   |
| FADL SALTY  | fadL | Long-chain fatty acid transport protein               | 1211600   |         |         |         |       | 178760    | 357230   | 675570   |
| FDHE SALTY  | fdhE | Protein FdhE                                          | 286160    |         |         |         |       | 86963     | 118270   | 80927    |
| FIMW SALTY  | fimW | Fimbriae W protein                                    | 512010    |         |         |         |       | 348360    |          | 163640   |

|             |      |                                                               |          |         |         |         |          |          |          |
|-------------|------|---------------------------------------------------------------|----------|---------|---------|---------|----------|----------|----------|
| FIMZ SALTY  | fimZ | Fimbriae Z protein                                            | 35517    |         |         |         | 12480    | 14706    | 8331.5   |
| FLAV SALTY  | fldA | Flavodoxin I                                                  | 2063700  | 40475   | 259140  |         | 242420   | 695300   | 826320   |
| FLGK SALTY  | flgK | Flagellar hook-associated protein 1                           | 1718200  |         |         |         | 507200   | 517100   | 693910   |
| FLGL SALTY  | flgL | Flagellar hook-associated protein 3                           | 65990    |         |         |         | 28100    | 21551    | 16339    |
| FLIB SALTY  | fliB | Lysine-N-methylase                                            | 2745500  |         | 228230  | 103180  | 879540   | 625540   | 909020   |
| FLIC SALTY  | fliC | Flagellin                                                     | 2723900  | 4747.9  | 10617   | 14743   | 550370   | 965290   | 1178100  |
| FLII SALTY  | fliI | Flagellum-specific ATP synthase                               | 478630   |         |         |         | 110790   | 124370   | 243470   |
| FLIL SALTY  | fliL | Flagellar protein FliL                                        | 341840   |         |         |         | 118170   | 107700   | 115970   |
| FLIO SALTY  | fliO | Flagellar protein FliO                                        | 272900   |         |         |         | 138400   |          | 134500   |
| FMT SALTY   | fmt  | Methionyl-tRNA formyltransferase                              | 481110   |         |         |         | 118310   | 104120   | 258680   |
| FNR SALTY   | fnr  | Fumarate and nitrate reduction regulatory protein             | 588580   |         |         |         | 218030   | 168920   | 201640   |
| FOLD SALTY  | folD | Bifunctional protein FolD                                     | 1990300  |         |         |         | 601220   | 666650   | 722420   |
| FRDC SALTY  | frdC | Fumarate reductase subunit C                                  | 23858000 |         | 72082   | 185850  | 8339800  | 7297000  | 7963200  |
| FRDD SALTY  | frdD | Fumarate reductase subunit D                                  | 4470800  | 27571   | 9808.2  | 30922   | 1512600  | 1670800  | 1219100  |
| FRE SALTY   | fre  | NAD(P)H-flavin reductase                                      | 1247500  |         |         |         | 385800   | 398740   | 462940   |
| FRSA SALTY  | frsA | Esterase FrsA                                                 | 3557800  |         |         |         | 996920   | 845360   | 1715600  |
| FSA SALTY   | fsa  | Fructose-6-phosphate aldolase                                 | 117770   |         |         |         |          | 117770   |          |
| FTSH SALTY  | ftsH | ATP-dependent zinc metalloprotease FtsH                       | 5964000  | 75414   | 105760  | 70939   | 2448700  | 1586400  | 1676900  |
| FUCI SALTY  | fucI | L-fucose isomerase                                            | 315880   |         |         |         | 91315    | 72564    | 152000   |
| FUCK SALTY  | fucK | L-fuculokinase                                                |          |         |         |         |          |          |          |
| FUMA SALTY  | fumA | Fumarate hydratase class I, aerobic                           | 3730700  |         |         |         | 1222700  | 904310   | 1603700  |
| FUMC SALTY  | fumC | Fumarate hydratase class II                                   | 4893600  |         |         |         | 2383200  | 1560300  | 950180   |
| G3P SALTY   | gapA | Glyceraldehyde-3-phosphate dehydrogenase                      | 91767000 | 2322400 | 2097300 | 3310400 | 28888000 | 26853000 | 28296000 |
| G6PI SALTY  | pgi  | Glucose-6-phosphate isomerase                                 | 10820000 |         |         | 16364   | 3998400  | 3651300  | 3153700  |
| GALF SALTY  | galF | UTP--glucose-1-phosphate uridylyltransferase                  | 218360   |         |         |         | 93240    | 44572    | 80552    |
| GALR SALTY  | galR | HTH-type transcriptional regulator galR                       | 20054    |         |         |         | 6396.8   | 7822     | 5835     |
| GCHIL SALTY | ybgI | GTP cyclohydrolase 1 type 2 homolog                           | 575810   |         |         |         | 135600   | 121450   | 318750   |
| GCSH SALTY  | gcvH | Glycine cleavage system H protein                             | 1654700  |         |         |         | 618580   | 595880   | 440240   |
| GCSP SALTY  | gcvP | Glycine dehydrogenase (decarboxylating)                       | 8755600  |         | 3883.3  |         | 2858400  | 3378800  | 2514500  |
| GCST SALTY  | gcvT | Aminomethyltransferase                                        | 1287400  |         |         |         | 406420   | 393110   | 487870   |
| GLGA SALTY  | glgA | Glycogen synthase                                             | 10201000 |         |         |         | 3904200  | 2490900  | 3805700  |
| GLGB SALTY  | glgB | 1,4-alpha-glucan branching enzyme GlgB                        | 2543800  |         |         |         | 781170   | 920570   | 842060   |
| GLGC SALTY  | glgC | Glucose-1-phosphate adenylyltransferase                       | 5717000  | 80320   | 13663   | 27756   | 2363100  | 1623800  | 1608400  |
| GLK SALTY   | glk  | Glucokinase                                                   | 12345000 | 2687.2  | 4708.2  |         | 4664000  | 3422700  | 4250600  |
| GLMM SALTY  | glmM | Phosphoglucosamine mutase                                     | 2007100  |         |         |         | 547980   | 955060   | 504020   |
| GLMS SALTY  | glmS | Glutamine--fructose-6-phosphate aminotransferase [isomerizin  | 5257500  |         |         | 7459.7  | 1536100  | 1400600  | 2313300  |
| GLMU SALTY  | glmU | Bifunctional protein GlmU                                     | 2042100  |         |         | 3386.1  | 701570   | 517180   | 820000   |
| GLN1B SALTY | glnA | Glutamine synthetase                                          | 2859500  |         |         | 7727    | 700830   | 799350   | 1351600  |
| GLNE SALTY  | glnE | Bifunctional glutamine synthetase adenylyltransferase/adenyly | 545200   |         |         |         | 51632    | 395300   | 98260    |

|             |      |                                                             |           |         |         |         |          |          |          |
|-------------|------|-------------------------------------------------------------|-----------|---------|---------|---------|----------|----------|----------|
| GLO2 SALTY  | gloB | Hydroxyacylglutathione hydrolase                            | 1328500   |         |         |         | 948530   |          | 379950   |
| GLPB SALTY  | glpB | Anaerobic glycerol-3-phosphate dehydrogenase subunit B      | 16530000  |         |         |         | 7680100  | 1865000  | 6984900  |
| GLPK SALTY  | glpK | Glycerol kinase                                             | 163400000 | 3480500 | 3931300 | 4326500 | 47636000 | 49504000 | 54522000 |
| GLRX1 SALTY | grxA | Glutaredoxin 1                                              | 1115700   |         |         |         | 504590   | 241960   | 369150   |
| GLTI SALTY  | gltI | Glutamate/aspartate import solute-binding protein           | 5267500   |         |         |         | 2493800  | 1421300  | 1352400  |
| GLYA SALTY  | glyA | Serine hydroxymethyltransferase                             | 12178000  | 12117   | 11021   | 18219   | 5215500  | 3435600  | 3485900  |
| GPDA SALTY  | gpsA | Glycerol-3-phosphate dehydrogenase [NAD(P)+]                | 764220    |         |         |         | 212920   | 147570   | 403730   |
| GPMA SALTY  | gpmA | 2,3-bisphosphoglycerate-dependent phosphoglycerate mutase   | 4388500   |         |         |         | 1650100  | 1208600  | 1529800  |
| GPMI SALTY  | gpmI | 2,3-bisphosphoglycerate-independent phosphoglycerate mutase | 513780    | 37867   |         |         | 261570   | 124830   | 89503    |
| GPPA SALTY  | gppA | Guanosine-5'-triphosphate,3'-diphosphate pyrophosphatase    | 1293900   |         |         |         | 348110   | 333800   | 611980   |
| GRCA SALTY  | grcA | Autonomous glycyl radical cofactor                          | 1981700   |         |         |         | 673310   | 708700   | 599690   |
| GREA SALTY  | greA | Transcription elongation factor GreA                        | 719950    |         | 6409.3  |         | 324460   | 230220   | 158860   |
| GSA SALTY   | hemL | Glutamate-1-semialdehyde 2,1-aminomutase                    | 3373900   |         |         |         | 1140600  | 692260   | 1541000  |
| GSH1 SALTY  | gshA | Glutamate--cysteine ligase                                  | 3559400   |         |         |         | 1570700  | 923640   | 1065000  |
| GSHB SALTY  | gshB | Glutathione synthetase                                      | 507660    |         |         |         | 386330   | 66600    | 54734    |
| GUAA SALTY  | guaA | GMP synthase [glutamine-hydrolyzing]                        | 1976600   | 23553   | 3882    |         | 532240   | 594830   | 822140   |
| GUAC SALTY  | guaC | GMP reductase                                               | 15966000  | 2517400 | 6212100 | 4822400 | 679830   | 919870   | 814700   |
| GYRA SALTY  | gyrA | DNA gyrase subunit A                                        | 10477000  | 11440   | 22993   | 44551   | 4118600  | 2836000  | 3442900  |
| GYRB SALTY  | gyrB | DNA gyrase subunit B                                        | 3833900   | 300160  | 148070  | 146150  | 1237900  | 1221400  | 780190   |
| HEM3 SALTY  | hemC | Porphobilinogen deaminase                                   | 144740    |         |         |         | 30011    |          | 114730   |
| HEM4 SALTY  | hemD | Uroporphyrinogen-III synthase                               | 701150    |         |         |         | 264370   | 222540   | 214240   |
| HEMG SALTY  | hemG | Protoporphyrinogen IX dehydrogenase [menaquinone]           | 384670    |         |         |         | 116410   | 87326    | 180940   |
| HEMH SALTY  | hemH | Ferrochelatase                                              | 602600    |         |         |         | 199870   | 115480   | 287250   |
| HEMN SALTY  | hemN | Oxygen-independent coproporphyrinogen III oxidase           | 108320    |         |         |         | 20740    | 42298    | 45286    |
| HILA SALTY  | hilA | Transcriptional regulator HilA                              | 32789000  | 123950  | 92521   | 155460  | 16701000 | 6579200  | 9136200  |
| HIS7 SALTY  | hisB | Histidine biosynthesis bifunctional protein HisB            | 2923400   | 14551   | 14432   |         | 1119800  | 1287300  | 487410   |
| HIS8 SALTY  | hisC | Histidinol-phosphate aminotransferase                       | 345510    |         |         |         | 102700   | 132450   | 110370   |
| HLDD SALTY  | hldD | ADP-L-glycero-D-manno-heptose-6-epimerase                   | 3062100   |         |         |         | 1281300  | 660490   | 1120300  |
| HLDE SALTY  | hldE | Bifunctional protein HldE                                   | 1746900   |         |         |         | 358620   | 374360   | 1014000  |
| HNS SALTY   | hns  | DNA-binding protein H-NS                                    | 9903900   | 150800  | 254130  | 277110  | 2920300  | 2166100  | 4135400  |
| HSCA SALTY  | hscA | Chaperone protein HscA                                      | 120580    |         |         |         | 57671    | 18493    | 44415    |
| HSLU SALTY  | hslU | ATP-dependent protease ATPase subunit HslU                  | 2568500   | 1318.5  | 11329   | 15770   | 862040   | 866570   | 811440   |
| HSLV SALTY  | hslV | ATP-dependent protease subunit HslV                         | 1103800   |         |         |         | 503900   | 207540   | 392330   |
| HTPG SALTY  | htpG | Chaperone protein HtpG                                      | 6181700   | 280540  | 308380  | 219320  | 1749900  | 1497100  | 2126500  |
| HTPX SALTY  | htpX | Protease HtpX                                               | 452720    |         |         |         | 138720   | 187010   | 126990   |
| HUTG SALTY  | hutG | Formimidoylglutamase                                        | 145560    |         |         |         | 72784    | 72779    |          |
| HUTH SALTY  | hutH | Histidine ammonia-lyase                                     | 7123900   |         |         | 2980.6  | 2549900  | 1483400  | 3087600  |
| HUTI SALTY  | hutI | Imidazolonepropionase                                       | 182210    |         |         |         | 103930   | 49134    | 29139    |
| IBPA SALTY  | ibpA | Small heat shock protein IbpA                               | 1251700   |         |         |         | 601720   | 239900   | 410040   |

|             |      |                                                                            |           |         |          |          |          |          |          |
|-------------|------|----------------------------------------------------------------------------|-----------|---------|----------|----------|----------|----------|----------|
| ICLR SALTY  | iclR | Acetate operon repressor                                                   | 233980    |         |          |          | 60606    | 55242    | 118130   |
| IF2 SALTY   | infB | Translation initiation factor IF-2                                         | 7452200   | 15593   | 28577    | 24628    | 2639700  | 2819900  | 1923800  |
| IF3 SALTY   | infC | Translation initiation factor IF-3                                         | 3980500   |         |          |          | 1873700  | 634090   | 1472600  |
| IHFA SALTY  | ihfA | Integration host factor subunit alpha                                      | 648830    |         |          |          | 412620   | 236210   |          |
| IHFB SALTY  | ihfB | Integration host factor subunit beta                                       | 1494900   | 128660  | 162340   | 234160   | 331830   | 353040   | 284840   |
| ILVD SALTY  | ilvD | Dihydroxy-acid dehydratase                                                 | 47943     |         |          |          | 16765    | 15483    | 15694    |
| ILVE SALTY  | ilvE | Branched-chain-amino-acid aminotransferase                                 | 722660    |         |          |          | 330810   | 177240   | 214610   |
| ILVI SALTY  | ilvI | Acetolactate synthase isozyme 3 large subunit                              | 225680    |         |          |          | 68096    | 39850    | 117730   |
| INVA SALTY  | invA | Invasion protein InvA                                                      | 2853600   |         | 10661    | 3924     | 719140   | 1237200  | 882720   |
| INVG SALTY  | invG | Protein InvG                                                               | 73382000  | 13097   | 45347    | 54873    | 30270000 | 22726000 | 20273000 |
| IPYR SALTY  | ppa  | Inorganic pyrophosphatase                                                  | 1128700   |         |          |          | 270950   | 471640   | 386090   |
| ISPG SALTY  | ispG | 4-hydroxy-3-methylbut-2-en-1-yl diphosphate synthase (flavo                | 5967200   |         |          |          | 2477300  | 1421300  | 2068600  |
| KATG SALTY  | katG | Catalase-peroxidase                                                        | 1031100   |         |          |          | 346310   | 372470   | 312270   |
| KBL SALTY   | kbl  | 2-amino-3-ketobutyrate coenzyme A ligase                                   | 2085000   |         |          | 12707    | 750100   | 680770   | 641410   |
| KDSA SALTY  | kdsA | 2-dehydro-3-deoxyphosphooctonate aldolase                                  | 505450    |         |          |          | 174160   | 180410   | 150890   |
| KDSB SALTY  | kdsB | 3-deoxy-manno-octulosonate cytidyltransferase                              | 29020     |         |          |          | 29020    |          |          |
| KDSD SALTY  | kdsD | Arabinose 5-phosphate isomerase KdsD                                       | 240740    |         |          |          | 100990   |          | 139750   |
| KEFC SALTY  | kefC | Glutathione-regulated potassium-efflux system protein KefC                 | 3539000   | 914710  | 1202600  | 1181100  | 62855    | 76618    | 101080   |
| KPRS SALTY  | prs  | Ribose-phosphate pyrophosphokinase                                         | 8691500   |         |          |          | 2722300  | 2042900  | 3926300  |
| KPYK1 SALTY | pykF | Pyruvate kinase I                                                          | 9444500   | 45294   | 55605    | 68787    | 3390100  | 2911400  | 2973300  |
| KPYK2 SALTY | pykA | Pyruvate kinase II                                                         | 9144800   | 127170  | 115680   | 39644    | 3873800  | 2049000  | 2939500  |
| LAMB SALTY  | lamB | Maltoporin                                                                 | 36698     |         |          |          | 12941    | 7626.7   | 16130    |
| LCFA SALTY  | fadD | Long-chain-fatty-acid--CoA ligase                                          | 625990    |         |          |          | 202590   | 155720   | 267680   |
| LDCI SALTY  | cadA | Inducible lysine decarboxylase                                             | 2200500   | 2992.2  |          |          | 903130   | 553640   | 740710   |
| LEP SALTY   | lepB | Signal peptidase I                                                         | 1982000   |         |          |          | 698980   | 687200   | 595790   |
| LEPA SALTY  | lepA | Elongation factor 4                                                        | 5920600   |         |          | 8868.8   | 1996900  | 1877600  | 2037200  |
| LGT SALTY   | lgt  | Prolipoprotein diacylglyceryl transferase                                  | 768210    |         |          |          | 172750   | 266890   | 328570   |
| LIVF SALTY  | livF | High-affinity branched-chain amino acid transport ATP-binding protein LivF |           |         |          |          |          |          |          |
| LLDD SALTY  | lldD | L-lactate dehydrogenase                                                    | 512650    |         |          |          | 211580   | 171880   | 129190   |
| LPLA SALTY  | lplA | Lipoate-protein ligase A                                                   | 166190    |         |          |          | 129330   |          | 36860    |
| LPP1 SALTY  | lppI | Major outer membrane lipoprotein 1                                         | 180330000 | 8799500 | 11019000 | 10326000 | 46366000 | 64061000 | 39759000 |
| LPTD SALTY  | lptD | LPS-assembly protein LptD                                                  | 709930    | 12974   |          | 4480.7   | 233830   | 203740   | 254900   |
| LPXA SALTY  | lpxA | Acyl-[acyl-carrier-protein]--UDP-N-acetylglucosamine O-acyl                | 635080    |         |          |          | 248390   | 178390   | 208300   |
| LPXC SALTY  | lpxC | UDP-3-O-acyl-N-acetylglucosamine deacetylase                               | 805020    |         |          |          | 280780   | 269660   | 254570   |
| LRP SALTY   | lrp  | Leucine-responsive regulatory protein                                      | 4154000   |         |          |          | 305260   | 2013100  | 1835700  |
| LSRA SALTY  | lsrA | Autoinducer 2 import ATP-binding protein LsrA                              | 2013800   |         |          |          | 618620   | 929290   | 465860   |
| LSRB SALTY  | lsrB | Autoinducer 2-binding protein LsrB                                         | 6347100   |         |          |          | 2297600  | 1531900  | 2517600  |
| LSRC SALTY  | lsrC | Autoinducer 2 import system permease protein LsrC                          | 428540    |         |          |          | 153120   | 129190   | 146230   |
| LSRD SALTY  | lsrD | Autoinducer 2 import system permease protein LsrD                          |           |         |          |          |          |          |          |

|             |      |                                                               |          |        |        |        |         |         |         |
|-------------|------|---------------------------------------------------------------|----------|--------|--------|--------|---------|---------|---------|
| LSRF SALTY  | lsrF | 3-hydroxy-5-phosphonooxypentane-2,4-dione thiolase            | 12958000 | 29579  | 19547  | 52359  | 5725300 | 3143700 | 3987000 |
| LSRK SALTY  | lsrK | Autoinducer-2 kinase                                          | 4495200  |        |        |        | 1541600 | 743820  | 2209800 |
| LSRR SALTY  | lsrR | Transcriptional regulator LsrR                                | 272680   |        |        |        | 162120  | 62716   | 47839   |
| LYSAC SALTY | pat  | Protein lysine acetyltransferase Pat                          | 1611700  |        |        |        | 422460  | 630350  | 558870  |
| MACB SALTY  | macB | Macrolide export ATP-binding/permease protein MacB            | 122210   |        |        |        | 32646   | 50690   | 38870   |
| MALG SALTY  | malG | Maltose transport system permease protein MalG                | 133160   |        |        |        | 133160  |         |         |
| MANA SALTY  | manA | Mannose-6-phosphate isomerase                                 | 1698500  |        |        |        | 727590  | 380590  | 590350  |
| MAO1 SALTY  | macA | NAD-dependent malic enzyme                                    | 11891000 | 107760 | 158030 | 105420 | 3956600 | 3621800 | 3941700 |
| MAO2 SALTY  | macB | NADP-dependent malic enzyme                                   | 11826000 | 67726  | 51260  | 33911  | 3961100 | 2771000 | 4940900 |
| MAP1 SALTY  | map  | Methionine aminopeptidase                                     | 592760   |        |        |        | 241630  | 63695   | 287430  |
| MCP2 SALTY  | tar  | Methyl-accepting chemotaxis protein II                        | 1205600  |        |        |        | 469040  | 285930  | 450650  |
| MDH SALTY   | mdh  | Malate dehydrogenase                                          | 11873000 | 192460 | 64678  | 68715  | 4427800 | 3628000 | 3491600 |
| MDTC SALTY  | mdtC | Multidrug resistance protein MdtC                             | 109760   |        | 1499.7 |        | 36504   | 28494   | 43259   |
| MDTK SALTY  | mdtK | Multidrug resistance protein MdtK                             | 124440   |        |        |        | 46391   | 44453   | 33593   |
| METC SALTY  | metC | Cystathionine beta-lyase                                      | 592460   |        |        |        | 73979   | 244190  | 274290  |
| METK SALTY  | metK | S-adenosylmethionine synthase                                 | 306060   | 7675.6 | 11330  | 14332  | 99492   | 94555   | 78674   |
| METQ SALTY  | metQ | D-methionine-binding lipoprotein MetQ                         | 1732600  |        |        |        | 857120  | 794740  | 80736   |
| MGLA SALTY  | mgIA | Galactose/methyl galactoside import ATP-binding protein Mgl   | 571060   |        |        |        | 177740  | 241960  | 151370  |
| MINC SALTY  | minC | Septum site-determining protein MinC                          | 361580   |        |        |        | 142850  | 115690  | 103030  |
| MINE SALTY  | minE | Cell division topological specificity factor                  | 677510   |        |        |        | 201100  | 156350  | 320050  |
| MNMC SALTY  | mnmC | tRNA 5-methylaminomethyl-2-thiouridine biosynthesis bifunc    | 109080   |        |        |        |         | 109080  |         |
| MNMG SALTY  | mnmG | tRNA uridine 5-carboxymethylaminomethyl modification enzy     | 49153    |        |        |        | 19118   | 13790   | 16245   |
| MODC SALTY  | modC | Molybdenum import ATP-binding protein ModC                    | 1678200  |        |        |        | 762830  | 262220  | 653190  |
| MOEA SALTY  | moeA | Molybdopterin molybdenumtransferase                           | 901700   |        |        |        | 282720  | 248730  | 370250  |
| MOTA SALTY  | motA | Motility protein A                                            | 681870   |        |        |        | 233050  | 217470  | 231350  |
| MREB SALTY  | mreB | Rod shape-determining protein MreB                            | 3279600  | 30120  |        |        | 1057900 | 827510  | 1364100 |
| MSBA SALTY  | msbA | Lipid A export ATP-binding/permease protein MsbA              | 1536500  | 4760.9 | 7914.9 |        | 634830  | 377230  | 511790  |
| MSCL SALTY  | mscL | Large-conductance mechanosensitive channel                    | 5986500  |        |        |        | 2298000 | 2737100 | 951480  |
| MSRA SALTY  | msrA | Peptide methionine sulfoxide reductase MsrA                   | 4399000  |        |        |        | 1705500 | 1415800 | 1277600 |
| MSRP SALTY  | msrP | Protein-methionine-sulfoxide reductase catalytic subunit MsrP | 100730   |        |        |        | 27262   | 36883   | 36581   |
| MTNN SALTY  | mtnN | 5'-methylthioadenosine/S-adenosylhomocysteine nucleosidase    | 423950   |        |        |        | 128500  | 131850  | 163610  |
| MUCB SALTM  | mucB | Protein MucB                                                  |          |        |        |        |         |         |         |
| MUKB SALTY  | mukB | Chromosome partition protein MukB                             | 771200   |        |        |        | 252060  | 174020  | 345120  |
| MURA SALTY  | murA | UDP-N-acetylglucosamine 1-carboxyvinyltransferase             | 448180   |        |        |        | 145740  | 154410  | 148030  |
| MURD SALTY  | murD | UDP-N-acetylmuramoylalanine--D-glutamate ligase               | 1617000  |        |        |        | 594400  | 583680  | 438930  |
| MURE SALTY  | murE | UDP-N-acetylmuramoyl-L-alanyl-D-glutamate--2,6-diaminopi      | 967800   |        |        |        | 356860  | 335800  | 275140  |
| MURG SALTY  | murG | UDP-N-acetylglucosamine--N-acetylmuramyl-(pentapeptide) p     | 1355200  |        |        |        | 422270  | 458950  | 473940  |
| MUTS SALTY  | mutS | DNA mismatch repair protein MutS                              | 1187100  |        |        |        | 350000  | 391510  | 445560  |
| NADE SALTY  | nadE | NH(3)-dependent NAD(+) synthetase                             | 561380   | 20167  | 15849  |        | 119540  | 249330  | 156500  |

|            |      |                                                               |          |        |        |        |          |          |          |
|------------|------|---------------------------------------------------------------|----------|--------|--------|--------|----------|----------|----------|
| NADR SALTY | nadR | Trifunctional NAD biosynthesis/regulator protein NadR         | 623540   |        |        |        | 254350   | 288570   | 80632    |
| NAGB SALTY | nagB | Glucosamine-6-phosphate deaminase                             | 3214800  |        |        |        | 1146400  | 932890   | 1135600  |
| NAGK SALTY | nagK | N-acetyl-D-glucosamine kinase                                 | 72509    |        |        |        |          |          | 72509    |
| NANA SALTY | nanA | N-acetylneuraminase lyase                                     | 758110   |        |        |        | 256610   | 303750   | 197750   |
| NAPA SALTY | napA | Periplasmic nitrate reductase                                 | 149670   |        |        |        | 33548    | 56393    | 59726    |
| NDK SALTY  | ndk  | Nucleoside diphosphate kinase                                 | 2040000  |        |        |        | 436000   | 550390   | 1053600  |
| NFUA SALTY | nfuA | Fe/S biogenesis protein NfuA                                  | 1488800  |        |        |        | 535060   | 375170   | 578520   |
| NHAA SALTY | nhaA | Na(+)/H(+) antiporter NhaA                                    | 94781    |        |        |        |          | 94781    |          |
| NHOA SALTY | nhoA | N-hydroxyarylamine O-acetyltransferase                        | 395640   |        |        |        | 249100   |          | 146550   |
| NLPD SALTY | nlpD | Murein hydrolase activator NlpD                               | 221860   |        |        |        | 55029    | 71672    | 95162    |
| NORR SALTY | norR | Anaerobic nitric oxide reductase transcription regulator NorR | 56609    |        |        |        | 20861    | 19695    | 16053    |
| NPD SALTY  | cobB | NAD-dependent protein deacylase                               | 5093700  |        |        |        | 2081400  | 1290700  | 1721600  |
| NQOR SALTY |      | NAD(P)H dehydrogenase (quinone)                               | 2208700  |        | 29614  | 4246.2 | 743990   | 835130   | 595730   |
| NRDD SALTY | nrdD | Anaerobic ribonucleoside-triphosphate reductase               | 1191500  | 4578.1 |        |        | 487290   | 375950   | 323680   |
| NRFA SALTY | nrfA | Cytochrome c-552                                              | 1245100  |        |        |        | 369760   | 349450   | 525940   |
| NUOA SALTY | nuoA | NADH-quinone oxidoreductase subunit A                         | 4995800  |        |        |        | 1613800  | 1410000  | 1972100  |
| NUOB SALTY | nuoB | NADH-quinone oxidoreductase subunit B                         | 1125400  |        |        |        | 532290   | 319110   | 274030   |
| NUOCD SALT | nuoC | NADH-quinone oxidoreductase subunit C/D                       | 40860000 |        | 13816  | 47676  | 19076000 | 11450000 | 10272000 |
| NUOF SALTY | nuoF | NADH-quinone oxidoreductase subunit F                         | 15252000 | 105010 |        |        | 6439800  | 4460300  | 4247300  |
| NUOG SALTY | nuoG | NADH-quinone oxidoreductase subunit G                         | 1909900  |        |        |        | 658830   | 765160   | 485900   |
| NUOH SALTY | nuoH | NADH-quinone oxidoreductase subunit H                         | 3767700  |        |        |        | 1403700  | 612610   | 1751400  |
| NUOI SALTY | nuoI | NADH-quinone oxidoreductase subunit I                         | 5947400  |        | 18657  | 19057  | 1720500  | 1353600  | 2835600  |
| NUOK SALTY | nuoK | NADH-quinone oxidoreductase subunit K                         | 8656700  |        |        |        | 2619700  | 2137000  | 3900100  |
| NUON SALTY | nuoN | NADH-quinone oxidoreductase subunit N                         | 620220   |        |        |        | 208250   | 176890   | 235090   |
| NUSA SALTY | nusA | Transcription termination/antitermination protein NusA        | 1793600  |        |        |        | 855060   | 562280   | 376300   |
| NUSG SALTY | nusG | Transcription termination/antitermination protein NusG        | 825250   |        |        |        | 361950   | 251510   | 211790   |
| OMPA SALTY | ompA | Outer membrane protein A                                      | 61340000 | 243860 | 222100 | 266730 | 15743000 | 29085000 | 15779000 |
| OMPC SALTY | ompC | Outer membrane protein C                                      | 9418000  |        | 17518  |        | 3809500  | 3178100  | 2412800  |
| OMPD SALTY | ompD | Outer membrane porin protein OmpD                             | 17742000 |        |        |        | 6855100  | 4725200  | 6162000  |
| OMPF SALTY | ompF | Outer membrane protein F                                      | 21431    |        |        |        | 8224.9   | 7777.8   | 5428.6   |
| OMPR SALTY | ompR | Transcriptional regulatory protein OmpR                       | 27656000 | 94966  |        |        | 8528500  | 7006500  | 12026000 |
| OMPW SALTY | ompW | Outer membrane protein W                                      | 18356000 | 5041.9 |        | 293890 | 4371400  | 6791100  | 6894600  |
| OPDA SALTY | prlC | Oligopeptidase A                                              | 9516200  |        | 82193  |        | 2923300  | 3557900  | 2952700  |
| OPGG SALTY | mdoG | Glucans biosynthesis protein G                                | 1522100  |        |        |        | 460890   | 596120   | 465080   |
| OPGH SALTY | mdoH | Glucans biosynthesis glucosyltransferase H                    | 119390   | 1288.4 | 2697.5 |        | 42938    | 27537    | 44931    |
| OPPA SALTY | oppA | Periplasmic oligopeptide-binding protein                      | 3276200  |        | 54639  | 5054.6 | 1481900  | 581720   | 1152800  |
| OPPD SALTY | oppD | Oligopeptide transport ATP-binding protein OppD               | 6888800  |        |        | 12571  | 3866600  | 1430700  | 1578900  |
| OPPF SALTY | oppF | Oligopeptide transport ATP-binding protein OppF               | 5597700  |        |        |        | 2222200  | 2443900  | 931570   |
| ORGA SALTY | orgA | Oxygen-regulated invasion protein OrgA                        | 992010   |        |        |        | 288980   | 142740   | 560280   |

|             |       |                                                            |          |         |          |         |          |          |          |
|-------------|-------|------------------------------------------------------------|----------|---------|----------|---------|----------|----------|----------|
| OTCC SALTY  | arcB  | Ornithine carbamoyltransferase, catabolic                  | 2691900  |         | 157340   |         | 1023600  | 398950   | 1112100  |
| OTSA SALTY  | otsA  | Trehalose-6-phosphate synthase                             | 2832400  |         |          | 26028   | 794680   | 1160500  | 851220   |
| PABB SALTY  | pabB  | Aminodeoxychorismate synthase component 1                  | 95018    |         |          |         | 76280    |          | 18738    |
| PAGC SALTY  | pagC  | Virulence membrane protein PagC                            | 37358000 | 187270  | 182770   | 661140  | 10484000 | 13518000 | 12325000 |
| PAGD SALTY  | pagD  | Virulence protein PagD                                     | 3225000  |         |          |         | 1072800  | 955420   | 1196700  |
| PAGN SALTY  | pagN  | Outer membrane protein PagN                                | 822070   |         |          |         | 183260   | 359980   | 278840   |
| PANC SALTY  | panC  | Pantothenate synthetase                                    | 824420   |         |          |         | 78599    | 204660   | 541160   |
| PAND SALTY  | panD  | Aspartate 1-decarboxylase                                  | 10860000 | 262860  | 432030   | 500770  | 2750800  | 3168200  | 3745100  |
| PARC SALTY  | parC  | DNA topoisomerase 4 subunit A                              | 5227900  | 1215100 | 1221400  | 1517000 | 406380   | 307210   | 560680   |
| PAT SALTY   | patA  | Putrescine aminotransferase                                | 1351900  | 55844   | 48213    | 55483   | 467710   | 277750   | 446900   |
| PCKA SALTY  | pckA  | Phosphoenolpyruvate carboxykinase (ATP)                    | 62206000 | 94947   | 82850    | 73780   | 23705000 | 18469000 | 19780000 |
| PCNB SALTY  | pcnB  | Poly(A) polymerase I                                       | 1494800  |         |          |         | 682420   | 312020   | 500350   |
| PDUC SALTY  | pduC  | Propanediol dehydratase large subunit                      | 96571000 | 4332900 | 47050000 | 614030  | 16570000 | 12581000 | 15423000 |
| PDXA2 SALTY | pdxA2 | D-threonate 4-phosphate dehydrogenase                      | 3999800  |         |          |         | 1614200  | 1039100  | 1346500  |
| PDXB SALTY  | pdxB  | Erythronate-4-phosphate dehydrogenase                      | 2426100  |         |          |         | 1118700  | 525140   | 782270   |
| PDXJ SALTY  | pdxJ  | Pyridoxine 5'-phosphate synthase                           | 1647600  |         |          |         | 561880   | 586920   | 498850   |
| PEFC SALTY  | pefC  | Outer membrane usher protein PefC                          | 203690   | 21970   | 58023    | 63832   | 18514    | 18853    | 22503    |
| PEPB SALTY  | pepB  | Peptidase B                                                | 698290   |         |          |         | 172690   | 227510   | 298090   |
| PEPQ SALTY  | pepQ  | Xaa-Pro dipeptidase                                        | 7290500  | 24641   |          |         | 2404600  | 2781400  | 2079900  |
| PEPT SALTY  | pepT  | Peptidase T                                                | 546240   | 4384.3  |          |         | 176850   | 172530   | 192470   |
| PFKA SALTY  | pfkA  | ATP-dependent 6-phosphofructokinase                        | 6415700  | 8588.1  | 10620    | 9071    | 1961400  | 2196200  | 2229800  |
| PGK SALTY   | pgk   | Phosphoglycerate kinase                                    | 14008000 |         | 52308    | 46548   | 4466400  | 3527700  | 5915300  |
| PGTE SALTY  | pgtE  | Outer membrane protease E                                  | 42522    |         |          |         | 12903    | 13473    | 16146    |
| PHON SALTY  | phoN  | Non-specific acid phosphatase                              | 2046800  |         |          |         | 835030   | 512390   | 699420   |
| PHOP SALTY  | phoP  | Virulence transcriptional regulatory protein PhoP          | 5329300  |         | 78294    | 53186   | 1665000  | 2043100  | 1489700  |
| PHOQ SALTY  | phoQ  | Virulence sensor histidine kinase PhoQ                     | 2896400  |         |          |         | 890070   | 806260   | 1200100  |
| PIPB2 SALTY | pipB2 | Secreted effector protein PipB2                            | 1295800  |         |          | 39962   | 353590   | 477860   | 424420   |
| PLSB SALTY  | plsB  | Glycerol-3-phosphate acyltransferase                       | 4401100  |         |          |         | 1802600  | 1290600  | 1307900  |
| PLSY SALTY  | plsY  | Glycerol-3-phosphate acyltransferase                       | 615170   |         |          |         | 193140   | 190500   | 231520   |
| PNP SALTY   | pnp   | Polyribonucleotide nucleotidyltransferase                  | 5084500  | 22779   | 15891    | 10859   | 1912800  | 1496800  | 1625400  |
| PPK1 SALTY  | ppk   | Polyphosphate kinase                                       | 4382500  |         |          |         | 1524700  | 1361200  | 1496500  |
| PPX SALTY   | ppx   | Exopolyphosphatase                                         | 892110   |         |          |         | 327220   | 342810   | 222080   |
| PRC SALTY   | prc   | Tail-specific protease                                     | 2436500  |         |          |         | 735990   | 805530   | 894970   |
| PRET SALTY  | preT  | NAD-dependent dihydropyrimidine dehydrogenase subunit PreT | 1012900  |         |          |         | 347810   | 343960   | 321110   |
| PRGH SALTY  | prgH  | Protein PrgH                                               | 31084000 | 9286.7  | 4718.6   | 4321.6  | 9927500  | 13471000 | 7667200  |
| PRGJ SALTY  | prgJ  | Protein PrgJ                                               |          |         |          |         |          |          |          |
| PRGK SALTY  | prgK  | Lipoprotein PrgK                                           | 357870   | 7642.3  | 6996.7   |         | 131700   | 111800   | 99735    |
| PROA SALTY  | proA  | Gamma-glutamyl phosphate reductase                         | 82091    |         |          |         | 27848    | 26598    | 27645    |
| PROQ SALTY  | proQ  | RNA chaperone ProQ                                         | 3257900  | 790410  | 1104000  | 708120  | 324050   | 331350   |          |

|             |      |                                                                           |          |        |        |         |          |          |          |
|-------------|------|---------------------------------------------------------------------------|----------|--------|--------|---------|----------|----------|----------|
| PROV SALTY  | proV | Glycine betaine/proline betaine transport system ATP-binding protein ProV |          |        |        |         |          |          |          |
| PROX SALTY  | proX | Glycine betaine/proline betaine-binding periplasmic protein               | 345360   |        |        |         | 70595    | 105270   | 169500   |
| PRPB SALTY  | prpB | 2-methylisocitrate lyase                                                  | 1441100  |        |        |         | 745360   | 300040   | 395740   |
| PRPC SALTY  | prpC | 2-methylcitrate synthase                                                  | 13304000 |        |        | 18133   | 4010900  | 4601600  | 4673500  |
| PRPD SALTY  | prpD | 2-methylcitrate dehydratase                                               | 36933000 | 27159  | 49210  | 55460   | 13968000 | 11112000 | 11721000 |
| PRPE SALTY  | prpE | Propionate--CoA ligase                                                    | 5220600  |        |        |         | 1581200  | 1528200  | 2111200  |
| PRPR SALTY  | prpR | Propionate catabolism operon regulatory protein                           | 103390   |        |        |         | 43099    | 42511    | 17777    |
| PSD SALTY   | psd  | Phosphatidylserine decarboxylase proenzyme                                | 23914000 |        |        |         | 7023800  | 8375200  | 8514700  |
| PT1 SALTY   | ptsI | Phosphoenolpyruvate-protein phosphotransferase                            | 19156000 |        | 3855.4 | 26516   | 6541300  | 5858400  | 6725700  |
| PT1P SALTY  | ptsP | Phosphoenolpyruvate-dependent phosphotransferase system                   | 991710   |        |        |         | 405930   | 230640   | 355130   |
| PTA SALTY   | pta  | Phosphate acetyltransferase                                               | 9063900  | 6298.9 | 13408  | 18868   | 3067400  | 3071700  | 2886300  |
| PTGA SALTY  | crr  | PTS system glucose-specific EIIA component                                | 567530   | 77764  |        |         | 261430   | 109570   | 118770   |
| PTGCB SALTY | ptsG | PTS system glucose-specific EIICB component                               | 2091900  |        |        |         | 1146500  | 283520   | 661820   |
| PUR4 SALTY  | purL | Phosphoribosylformylglycinamide synthase                                  | 301560   | 50933  | 75098  | 77736   | 53028    | 23834    | 20928    |
| PURA SALTY  | purA | Adenylosuccinate synthetase                                               | 4097700  |        | 4227.6 |         | 1642600  | 695020   | 1755900  |
| PUTA SALTY  | putA | Bifunctional protein PutA                                                 | 26540000 | 28485  | 10264  | 9184.3  | 8958200  | 7707900  | 9826300  |
| PUTP SALTY  | putP | Sodium/proline symporter                                                  | 1775300  |        |        |         | 819830   | 541160   | 414270   |
| PYRC SALTY  |      | Dihydroorotase                                                            | 311840   |        |        |         | 116780   | 50591    | 144470   |
| PYRD SALTY  | pyrD | Dihydroorotate dehydrogenase (quinone)                                    | 272160   |        |        |         | 126330   | 99263    | 46575    |
| PYRE SALTY  | pyrE | Orotate phosphoribosyltransferase                                         | 430780   |        |        |         | 121280   | 108250   | 201250   |
| PYRG SALTY  | pyrG | CTP synthase                                                              | 3710100  | 13821  | 17781  | 22182   | 1492500  | 640450   | 1523300  |
| PYRH SALTY  | pyrH | Uridylate kinase                                                          | 5925500  |        |        |         | 1718300  | 1980500  | 2226700  |
| QOR SALTY   | qor  | Quinone oxidoreductase                                                    | 1611100  |        |        |         | 459940   | 208940   | 942220   |
| QUEF SALTY  | queF | NADPH-dependent 7-cyano-7-deazaguanine reductase                          | 403930   |        |        |         | 152600   | 125280   | 126050   |
| RADA SALTY  | radA | DNA repair protein RadA                                                   | 93994    |        |        |         | 33457    | 31902    | 28635    |
| RAPA SALTY  | rapA | RNA polymerase-associated protein RapA                                    | 800990   |        |        |         | 242130   | 339490   | 219370   |
| RAPZ SALTY  | rapZ | RNase adapter protein RapZ                                                | 779870   |        |        |         |          | 217480   | 562390   |
| RAVA SALTY  | ravA | ATPase RavA                                                               | 502160   |        |        |         | 148840   | 138460   | 214870   |
| RCNR SALTY  | rcnR | Transcriptional repressor RcnR                                            | 699850   |        |        |         | 272860   | 184580   | 242410   |
| RCSB SALTY  | rcsB | Transcriptional regulatory protein RcsB                                   | 5545600  |        |        | 3864900 | 490330   | 353960   | 836330   |
| RECA SALTY  | recA | Protein RecA                                                              | 10451000 | 34201  |        |         | 6323000  | 1841000  | 2252800  |
| REP SALTY   | rep  | ATP-dependent DNA helicase Rep                                            | 40399    |        |        |         | 13067    | 12955    | 14377    |
| RF3 SALTY   | prfC | Peptide chain release factor 3                                            | 258550   |        |        |         | 114360   | 62529    | 81664    |
| RFAB SALTY  | rfaB | Lipopolysaccharide 1,6-galactosyltransferase                              | 1076800  |        |        | 2865.3  | 456810   | 239470   | 377660   |
| RFAF SALTY  | rfaF | ADP-heptose--LPS heptosyltransferase 2                                    | 1100200  |        |        |         | 281420   | 330280   | 488530   |
| RFAI SALTY  | rfaI | Lipopolysaccharide 1,3-galactosyltransferase                              | 319980   |        |        |         | 42107    | 124510   | 153370   |
| RFA Y SALTY | rfaY | Lipopolysaccharide core heptose(II) kinase RfaY                           | 1902100  |        |        |         | 613660   | 736290   | 552130   |
| RFBF SALTY  | rfbF | Glucose-1-phosphate cytidyltransferase                                    | 3771900  |        |        |         | 1763400  | 1090900  | 917560   |
| RFBG SALTY  | rfbG | CDP-glucose 4,6-dehydratase                                               | 1838900  |        |        |         | 555430   | 597440   | 686010   |

|      |       |      |                                                      |           |         |         |         |          |          |          |
|------|-------|------|------------------------------------------------------|-----------|---------|---------|---------|----------|----------|----------|
| RFBH | SALTY | rfbH | Lipopolysaccharide biosynthesis protein RfbH         | 18424000  | 10744   |         | 10410   | 7919100  | 5592100  | 4891800  |
| RFBI | SALTY | rfbI | Protein RfbI                                         | 845450    |         |         |         | 292490   | 74335    | 478630   |
| RFBJ | SALTY | rfbJ | CDP-abequose synthase                                | 4423400   |         |         |         | 727810   | 1139200  | 2556300  |
| RFBK | SALTY | rfbK | Phosphomannomutase                                   | 705920    |         |         |         | 129440   | 162670   | 413810   |
| RFBN | SALTY | rfbN | O antigen biosynthesis rhamnosyltransferase RfbN     | 1022400   |         |         |         | 283890   | 394280   | 344250   |
| RFBP | SALTY | rfbP | Undecaprenyl-phosphate galactose phosphotransferase  |           |         |         |         |          |          |          |
| RFBU | SALTY | rfbU | Protein RfbU                                         | 510150    |         |         |         | 188230   | 132640   | 189280   |
| RFBV | SALTY | rfbV | Abequosyltransferase RfbV                            | 524710    |         |         |         | 162540   | 162860   | 199300   |
| RHLB | SALTY | rhIB | ATP-dependent RNA helicase RhlB                      | 1309200   |         |         |         | 417460   | 470760   | 420950   |
| RHO  | SALTY | rho  | Transcription termination factor Rho                 | 14481000  | 11563   | 44969   | 48079   | 4332200  | 4435600  | 5608300  |
| RIBB | SALTY | ribB | 3,4-dihydroxy-2-butanone 4-phosphate synthase        | 1724200   |         |         |         | 618720   | 524780   | 580720   |
| RIDA | SALTY | ridA | 2-iminobutanoate/2-iminopropanoate deaminase         | 4107400   | 216130  | 278320  | 355990  | 882420   | 1322900  | 1051600  |
| RIHA | SALTY | rihA | Pyrimidine-specific ribonucleoside hydrolase RihA    | 596190    |         |         |         | 202040   | 208740   | 185410   |
| RIHC | SALTY | rihC | Non-specific ribonucleoside hydrolase RihC           | 3842800   |         |         |         | 1177500  | 1296300  | 1369100  |
| RIMM | SALTY | rimM | Ribosome maturation factor RimM                      | 2167700   | 16579   |         |         | 688100   | 760620   | 702390   |
| RIMO | SALTY | rimO | Ribosomal protein S12 methylthiotransferase RimO     | 421230    |         |         |         | 228580   | 117840   | 74798    |
| RIR1 | SALTY | nrdA | Ribonucleoside-diphosphate reductase 1 subunit alpha | 13635000  | 2661.2  | 3113.3  | 7503.6  | 5115500  | 4410400  | 4096100  |
| RIR2 | SALTY | nrdB | Ribonucleoside-diphosphate reductase 1 subunit beta  | 2454900   |         |         |         | 835730   | 800320   | 818830   |
| RIR3 | SALTY | nrdE | Ribonucleoside-diphosphate reductase 2 subunit alpha | 561750    |         |         |         | 295180   | 266580   |          |
| RL1  | SALTY | rplA | 50S ribosomal protein L1                             | 6471000   |         | 84484   | 86094   | 2593200  | 1892100  | 1815100  |
| RL10 | SALTY | rplJ | 50S ribosomal protein L10                            | 13716000  |         | 1100800 | 7995100 | 1043700  | 1617000  | 1959600  |
| RL11 | SALTY | rplK | 50S ribosomal protein L11                            | 7665100   | 1202200 | 1098400 | 1004900 | 1467200  | 1630400  | 1262100  |
| RL13 | SALTY | rplM | 50S ribosomal protein L13                            | 46363000  | 208070  | 244640  | 319770  | 14493000 | 12276000 | 18821000 |
| RL14 | SALTY | rplN | 50S ribosomal protein L14                            | 3750800   | 31683   | 31026   | 26173   | 1326800  | 1136800  | 1198300  |
| RL15 | SALTY | rplO | 50S ribosomal protein L15                            | 228010000 | 1054200 | 1295900 | 987380  | 64090000 | 61771000 | 98810000 |
| RL16 | SALTY | rplP | 50S ribosomal protein L16                            | 55571000  |         |         |         | 15343000 | 14038000 | 26191000 |
| RL17 | SALTY | rplQ | 50S ribosomal protein L17                            | 4839700   |         | 59046   |         | 1350800  | 1734400  | 1695400  |
| RL18 | SALTY | rplR | 50S ribosomal protein L18                            | 951510    | 32128   | 22293   | 22148   | 319310   | 298100   | 257540   |
| RL19 | SALTY | rplS | 50S ribosomal protein L19                            | 91821000  | 174710  | 714990  | 7562.3  | 31218000 | 33313000 | 26393000 |
| RL2  | SALTY | rplB | 50S ribosomal protein L2                             | 148080000 | 1600400 | 1929200 | 1695500 | 49559000 | 46045000 | 47250000 |
| RL20 | SALTY | rplT | 50S ribosomal protein L20                            | 86952000  | 272560  | 833180  | 565670  | 29611000 | 27196000 | 28474000 |
| RL21 | SALTY | rplU | 50S ribosomal protein L21                            | 9605400   |         |         |         | 3804700  | 3083600  | 2717100  |
| RL22 | SALTY | rplV | 50S ribosomal protein L22                            | 13721000  | 312220  | 514710  | 87833   | 4639700  | 5877500  | 2289300  |
| RL23 | SALTY | rplW | 50S ribosomal protein L23                            | 3612400   | 251090  | 75415   | 136930  | 1181000  | 985100   | 982890   |
| RL24 | SALTY | rplX | 50S ribosomal protein L24                            | 1928600   |         |         | 50190   | 802410   | 766670   | 309340   |
| RL27 | SALTY | rpmA | 50S ribosomal protein L27                            | 2400800   |         | 160110  | 148440  | 774430   | 648510   | 669250   |
| RL28 | SALTY | rpmB | 50S ribosomal protein L28                            | 45887000  | 65801   | 66669   | 72583   | 29946000 | 10864000 | 4872000  |
| RL3  | SALTY | rplC | 50S ribosomal protein L3                             | 20585000  | 394380  | 615660  | 1228000 | 7487900  | 3872600  | 6986000  |
| RL30 | SALTY | rpmD | 50S ribosomal protein L30                            | 6076500   |         |         | 251790  | 4493200  | 1141300  | 190120   |

|            |      |                                                     |           |         |         |         |  |           |           |           |
|------------|------|-----------------------------------------------------|-----------|---------|---------|---------|--|-----------|-----------|-----------|
| RL32 SALTY | rpmF | 50S ribosomal protein L32                           | 3061800   |         |         |         |  | 1026000   | 993460    | 1042300   |
| RL4 SALTY  | rplD | 50S ribosomal protein L4                            | 20164000  | 28552   |         |         |  | 5977300   | 6596700   | 7561100   |
| RL5 SALTY  | rplE | 50S ribosomal protein L5                            | 31970000  | 7751.5  | 280950  | 136640  |  | 13265000  | 9935800   | 8343900   |
| RL6 SALTY  | rplF | 50S ribosomal protein L6                            | 17201000  | 324930  | 400640  | 471010  |  | 5495100   | 4185300   | 6323700   |
| RL7 SALTY  | rplL | 50S ribosomal protein L7/L12                        | 1037300   |         |         |         |  | 359790    | 302770    | 374770    |
| RL9 SALTY  | rplI | 50S ribosomal protein L9                            | 4579900   | 125480  | 171230  |         |  | 1579800   | 364330    | 2339000   |
| RLMD SALTY | rlmD | 23S rRNA (uracil(1939)-C(5))-methyltransferase RlmD | 403110    |         |         |         |  | 136750    | 127270    | 139090    |
| RLMI SALTY | rlmI | Ribosomal RNA large subunit methyltransferase I     | 2627300   |         |         |         |  | 889080    | 759910    | 978260    |
| RLMKL SALT | rlmL | Ribosomal RNA large subunit methyltransferase K/L   | 583620    | 20077   |         |         |  | 202410    | 174600    | 186530    |
| RLMM SALTY | rlmM | Ribosomal RNA large subunit methyltransferase M     | 157990    |         |         |         |  | 50352     | 50647     | 56990     |
| RLUB SALTY | rluB | Ribosomal large subunit pseudouridine synthase B    | 2625700   |         |         |         |  | 961270    | 791120    | 873280    |
| RLUC SALTY | rluC | Ribosomal large subunit pseudouridine synthase C    | 88058     |         |         |         |  | 24876     | 36617     | 26564     |
| RLUF SALTY | rluF | 23S rRNA pseudouridine(2604) synthase               | 293210    |         |         |         |  | 46164     | 138130    | 108910    |
| RLX2 SALTM |      | 22 kDa relaxation protein                           | 2294500   |         |         |         |  |           | 2294500   |           |
| RMUC SALTY | rmuC | DNA recombination protein RmuC                      | 8151600   | 2553000 | 2262700 | 2714200 |  | 193830    | 241120    | 186770    |
| RNB SALTY  | rnb  | Exoribonuclease 2                                   | 251980    |         |         |         |  | 26835     | 158530    | 66610     |
| RNPH SALTY | rph  | Ribonuclease PH                                     | 4679600   |         |         |         |  | 1852200   | 1478900   | 1348600   |
| RODZ SALTY | rodZ | Cytoskeleton protein RodZ                           | 3072900   |         |         |         |  | 785620    | 1187300   | 1099900   |
| RPIA SALTY | rpiA | Ribose-5-phosphate isomerase A                      | 250760    |         |         |         |  | 112660    | 63462     | 74634     |
| RPOA SALTY | rpoA | DNA-directed RNA polymerase subunit alpha           | 12007000  | 241240  | 85956   | 104450  |  | 3993100   | 3319600   | 4263100   |
| RPOB SALTY | rpoB | DNA-directed RNA polymerase subunit beta            | 26336000  | 39936   | 57276   | 59618   |  | 9974000   | 7349400   | 8856000   |
| RPOC SALTY | rpoC | DNA-directed RNA polymerase subunit beta'           | 23616000  | 2904.7  | 15768   | 29404   |  | 8636500   | 7500300   | 7430900   |
| RPOD SALTY | rpoD | RNA polymerase sigma factor RpoD                    | 3210600   |         |         |         |  | 885890    | 949640    | 1375000   |
| RRF SALTY  | fir  | Ribosome-recycling factor                           | 177910    |         |         |         |  | 51000     | 65328     | 61581     |
| RS10 SALTY | rpsJ | 30S ribosomal protein S10                           | 12835000  | 1020700 | 1868700 | 2017500 |  | 3916000   | 2006200   | 2005400   |
| RS11 SALTY | rpsK | 30S ribosomal protein S11                           | 10733000  | 138200  | 114500  | 269880  |  | 4278000   | 2608300   | 3323800   |
| RS12 SALTY | rpsL | 30S ribosomal protein S12                           | 18090000  | 1208800 | 2714400 | 2436200 |  | 4068500   | 3823500   | 3839200   |
| RS13 SALTY | rpsM | 30S ribosomal protein S13                           | 77402000  | 119650  | 1095800 | 369600  |  | 21759000  | 23884000  | 30174000  |
| RS14 SALTY | rpsN | 30S ribosomal protein S14                           | 16769000  | 81008   |         |         |  | 6527500   | 1628300   | 8532500   |
| RS16 SALTY | rpsP | 30S ribosomal protein S16                           | 2112400   | 299110  | 422740  |         |  |           | 587240    | 803290    |
| RS17 SALTY | rpsQ | 30S ribosomal protein S17                           | 19402000  | 1606900 | 976120  | 1401600 |  | 6338200   | 5169700   | 3910000   |
| RS18 SALTY | rpsR | 30S ribosomal protein S18                           | 35701000  | 231810  | 506870  |         |  | 10628000  | 7293200   | 17041000  |
| RS19 SALTY | rpsS | 30S ribosomal protein S19                           | 1063900   |         |         |         |  | 538400    | 394250    | 131250    |
| RS2 SALTY  | rpsB | 30S ribosomal protein S2                            | 6136300   | 5321.5  | 25163   | 8154.1  |  | 1865100   | 2027500   | 2205100   |
| RS21 SALTY | rpsU | 30S ribosomal protein S21                           | 36612000  | 1354200 | 2214900 | 2649800 |  | 9190100   | 12794000  | 8409000   |
| RS3 SALTY  | rpsC | 30S ribosomal protein S3                            | 347220000 | 1929300 | 2583200 | 2825900 |  | 110040000 | 105000000 | 124840000 |
| RS4 SALTY  | rpsD | 30S ribosomal protein S4                            | 56701000  | 176680  | 131850  | 193860  |  | 20436000  | 16187000  | 19575000  |
| RS5 SALTY  | rpsE | 30S ribosomal protein S5                            | 6647800   | 172720  | 124100  | 124270  |  | 665450    | 2948100   | 2613200   |
| RS6 SALTY  | rpsF | 30S ribosomal protein S6                            | 1024100   |         |         |         |  | 374230    | 335000    | 314840    |

|       |       |       |                                                   |          |        |        |        |          |          |          |
|-------|-------|-------|---------------------------------------------------|----------|--------|--------|--------|----------|----------|----------|
| RS7   | SALTY | rpsG  | 30S ribosomal protein S7                          | 7450700  | 108560 | 136260 | 154330 | 2047200  | 2302900  | 2701400  |
| RS8   | SALTY | rpsH  | 30S ribosomal protein S8                          | 2479900  | 101840 | 115320 | 129970 | 936930   | 576630   | 619190   |
| RS9   | SALTY | rpsI  | 30S ribosomal protein S9                          | 17015000 | 108270 | 171620 | 210730 | 5939500  | 5267300  | 5317300  |
| RSEB  | SALT1 | rseB  | Sigma-E factor regulatory protein RseB            | 964350   |        |        |        | 346340   | 123620   | 494390   |
| RSXD  | SALTY | rsxD  | Electron transport complex subunit RsdD           | 146420   |        |        |        | 45102    | 55967    | 45346    |
| SAPF  | SALTY | sapF  | Peptide transport system ATP-binding protein SapF | 333700   |        |        |        | 132540   | 67760    | 133400   |
| SDHA  | SALTY | sdhA  | Succinate dehydrogenase flavoprotein subunit      | 26879000 | 376660 | 317710 | 595470 | 11406000 | 7191600  | 6991600  |
| SDHB  | SALTY | sdhB  | Succinate dehydrogenase iron-sulfur subunit       | 2464400  |        |        | 9567.7 | 879940   | 788100   | 786740   |
| SDHD  | SALTY | sdhA  | D-serine dehydratase                              | 266120   |        |        |        | 60232    | 133490   | 72396    |
| SECA  | SALTY | secA  | Protein translocase subunit SecA                  | 8031100  |        | 107880 |        | 2666600  | 2771600  | 2485000  |
| SECB  | SALTY | secB  | Protein-export protein SecB                       | 2101700  |        |        |        | 800890   | 515720   | 785130   |
| SECE  | SALTY | secE  | Protein translocase subunit SecE                  | 2036000  |        |        |        | 627750   | 723960   | 684270   |
| SELD  | SALTY | selD  | Selenide, water dikinase                          | 318760   |        |        |        | 258370   |          | 60389    |
| SEQA  | SALTY | seqA  | Negative modulator of initiation of replication   | 212290   |        |        |        | 60383    | 72401    | 79510    |
| SERC  | SALTY | serC  | Phosphoserine aminotransferase                    | 147970   |        |        |        | 47312    | 59545    | 41110    |
| SICA  | SALTY | sicA  | Chaperone protein SicA                            | 603980   |        |        |        | 307550   | 108670   | 187770   |
| SIFA  | SALTY | sifA  | Secreted effector protein SifA                    | 77787    |        |        |        | 28452    | 24326    | 25009    |
| SIGE  | SALTY | sigE  | Chaperone protein SigE                            | 10243000 | 158390 | 149620 | 201390 | 2993400  | 4528200  | 2211600  |
| SINR  | SALTY | sinR  | Probable HTH-type transcriptional regulator SinR  | 266720   |        |        |        | 44045    | 82080    | 140600   |
| SIPA  | SALTY | sipA  | Cell invasion protein SipA                        | 2921800  | 639.97 |        | 4656.9 | 904580   | 786580   | 1225300  |
| SIPB  | SALTY | sipB  | Cell invasion protein SipB                        | 3132300  | 114510 | 1707.8 | 3062.9 | 1079900  | 828180   | 1105000  |
| SIPC  | SALTY | sipC  | Cell invasion protein SipC                        | 43680000 | 235440 | 147310 | 185220 | 15291000 | 9926300  | 17895000 |
| SIPD  | SALTY | sipD  | Cell invasion protein SipD                        | 379630   |        |        |        | 86047    | 69363    | 224220   |
| SLT   | SALTY | slt   | Soluble lytic murein transglycosylase             | 472610   |        |        |        | 193420   | 150870   | 128310   |
| SLYA  | SALTY | slyA  | Transcriptional regulator SlyA                    | 2322800  |        |        |        | 1540900  | 420250   | 361650   |
| SLYB  | SALTY | slyB  | Outer membrane lipoprotein SlyB                   | 37080000 |        | 103830 | 520060 | 9423500  | 11140000 | 15893000 |
| SODC  | SALTY | sodC  | Superoxide dismutase [Cu-Zn] 2                    | 366220   |        |        |        | 120960   | 117350   | 127910   |
| SODC1 | SALTY | sodC1 | Superoxide dismutase [Cu-Zn] 1                    | 999310   |        | 63478  |        | 316430   | 317400   | 302010   |
| SODF  | SALTY | sodB  | Superoxide dismutase [Fe]                         | 46380000 | 648920 | 820800 | 272260 | 25349000 | 8244600  | 11044000 |
| SOPA  | SALTY | sopA  | E3 ubiquitin-protein ligase SopA                  | 202550   |        |        |        | 120920   | 41482    | 40154    |
| SOPB  | SALTY | sopB  | Inositol phosphate phosphatase SopB               | 25514000 |        | 7261.5 | 10244  | 11543000 | 7849400  | 6103900  |
| SOPD  | SALTY | sopD  | Secreted effector protein SopD                    | 1731200  | 19018  | 19567  | 23362  | 584530   | 607090   | 477640   |
| SOPD2 | SALTY | sopD2 | Secreted effector protein sopD2                   | 3515600  | 3824.7 |        |        | 1290800  | 902990   | 1317900  |
| SOPE  | SALTM | sopE  | Guanine nucleotide exchange factor SopE           | 19967000 | 22086  |        |        | 6057400  | 6701500  | 7186100  |
| SOPE2 | SALTY | sopE2 | Guanine nucleotide exchange factor sopE2          | 4174700  | 7399.2 | 7909.5 |        | 1431100  | 1210400  | 1517900  |
| SPAK  | SALTY | spaK  | Surface presentation of antigens protein SpaK     | 50323000 |        | 303160 | 484780 | 15305000 | 12152000 | 22078000 |
| SPAL  | SALTY | spaL  | Probable ATP synthase SpaL                        | 6221700  | 6707.5 | 17582  |        | 1955000  | 1954700  | 2287800  |
| SPAO  | SALTY | spaO  | Surface presentation of antigens protein SpaO     | 8956400  | 33236  | 39190  | 92976  | 4310400  | 2548200  | 1932400  |
| SPAP  | SALTY | spaP  | Surface presentation of antigens protein SpaP     | 4732600  |        |        |        | 1423700  | 1383400  | 1925500  |

|            |      |                                                       |          |        |        |        |          |          |          |
|------------|------|-------------------------------------------------------|----------|--------|--------|--------|----------|----------|----------|
| SPAQ SALTY | spaQ | Surface presentation of antigens protein SpaQ         | 7773000  |        |        |        | 2458800  | 1322500  | 3991800  |
| SPEA SALTY | speA | Biosynthetic arginine decarboxylase                   | 4341200  |        | 12456  |        | 1019300  | 1535400  | 1774200  |
| SPEB SALTY | speB | Agmatinase                                            | 1001700  |        |        |        | 439860   | 289090   | 272690   |
| SPEE SALTY | speE | Polyamine aminopropyltransferase                      | 272170   |        | 60291  |        | 211880   |          |          |
| SPIA SALTY | spiA | Type III secretion system outer membrane protein SpiA | 2260700  |        |        |        | 850870   | 673730   | 736140   |
| SPTP SALTY | sptP | Secreted effector protein SptP                        | 1325300  |        |        |        | 519580   | 282740   | 522990   |
| SRA SALTY  | sra  | Stationary-phase-induced ribosome-associated protein  | 2106400  |        |        |        | 649100   | 657240   | 800120   |
| SSAJ SALTY | ssaJ | Secretion system apparatus lipoprotein SsaJ           | 1460000  | 400370 | 479830 | 579810 |          |          |          |
| SSAK SALTY | ssaK | Secretion system apparatus protein SsaK               | 4636600  |        |        |        | 1021500  | 2600300  | 1014800  |
| SSAL SALTY | ssaL | Secretion system apparatus protein SsaL               | 3080400  |        |        |        | 1042300  | 999520   | 1038600  |
| SSAN SALTY | ssaN | Probable secretion system apparatus ATP synthase SsaN | 4610000  |        |        |        | 1783200  | 1255100  | 1571700  |
| SSAO SALTY | ssaO | Secretion system apparatus protein SsaO               | 941270   |        |        |        | 373050   | 286370   | 281860   |
| SSEA SALTY | sseA | Type III secretion system chaperone SseA              | 3294300  |        |        |        | 1677000  | 1081900  | 535350   |
| SSEB SALTY | sseB | Secreted effector protein SseB                        | 161550   | 8946   | 16708  | 15313  |          | 71563    | 49024    |
| SSEC SALTY | sseC | Secreted effector protein SseC                        | 1415300  |        |        |        | 551420   | 441310   | 422530   |
| SSEJ SALTY | sseJ | Secreted effector protein SseJ                        | 552520   |        |        |        | 129450   | 223770   | 199300   |
| SSRP SALTY | smpB | SsrA-binding protein                                  | 8284400  |        | 6057.8 |        | 2693300  | 2576800  | 3008200  |
| STEC SALTY | steC | Secreted effector kinase SteC                         | 2785300  |        |        |        | 960340   | 1007000  | 817980   |
| STHA SALTY | sthA | Soluble pyridine nucleotide transhydrogenase          | 3958700  | 10805  | 76428  | 8411.5 | 1362900  | 1159900  | 1340300  |
| STPA SALTY | stpA | DNA-binding protein StpA                              | 1529200  |        | 379710 | 956010 | 45952    | 74493    | 73071    |
| SUCC SALTY | sucC | Succinate--CoA ligase [ADP-forming] subunit beta      | 24094000 | 197070 | 248140 | 249180 | 7650100  | 7350800  | 8399100  |
| SUFS SALTY | sufS | Cysteine desulfurase                                  | 521480   |        |        |        | 71419    | 96435    | 353630   |
| SUHB SALTY | suhB | Inositol-1-monophosphatase                            | 551530   |        |        |        | 181650   | 154420   | 215460   |
| SYA SALTY  | alaS | Alanine--tRNA ligase                                  | 9602000  |        |        |        | 3050600  | 3138700  | 3412700  |
| SYC SALTY  | cysS | Cysteine--tRNA ligase                                 | 2317600  |        |        |        | 1019400  | 624930   | 673290   |
| SYD SALTY  | aspS | Aspartate--tRNA ligase                                | 16240000 |        | 9668.6 | 7558.2 | 6053400  | 5758200  | 4411400  |
| SYE SALTY  | gltX | Glutamate--tRNA ligase                                | 1007400  |        |        |        | 343320   | 329480   | 334570   |
| SYFA SALTY | pheS | Phenylalanine--tRNA ligase alpha subunit              | 1481200  | 23472  | 33805  | 43800  | 448020   | 445040   | 487020   |
| SYFB SALTY | pheT | Phenylalanine--tRNA ligase beta subunit               | 1730000  |        | 3402.9 | 2579.9 | 575460   | 588460   | 560130   |
| SYGA SALTY | glyQ | Glycine--tRNA ligase alpha subunit                    | 1005500  |        |        |        | 374550   | 328840   | 302130   |
| SYGB SALTY | glyS | Glycine--tRNA ligase beta subunit                     | 3773400  |        |        |        | 1769100  | 942050   | 1062200  |
| SYH SALTY  | hisS | Histidine--tRNA ligase                                | 2820100  |        | 7461.6 | 6520.3 | 914700   | 809760   | 1081700  |
| SYI SALTY  | ileS | Isoleucine--tRNA ligase                               | 8630900  | 38036  | 14048  | 5582.6 | 2822200  | 2484100  | 3267000  |
| SYK1 SALTY | lysS | Lysine--tRNA ligase                                   | 55347000 | 75013  | 125500 | 51788  | 16768000 | 18037000 | 20289000 |
| SYL SALTY  | leuS | Leucine--tRNA ligase                                  | 6359900  |        |        | 6067.9 | 1806900  | 1689100  | 2857900  |
| SYM SALTY  | metG | Methionine--tRNA ligase                               | 4773900  | 1299.8 |        |        | 2157400  | 1392700  | 1222500  |
| SYN SALTY  | asnS | Asparagine--tRNA ligase                               | 17001000 | 61010  | 28876  | 145480 | 5417400  | 6474300  | 4874000  |
| SYQ SALTY  | glnS | Glutamine--tRNA ligase                                | 1347500  |        |        | 13077  | 417410   | 371990   | 545040   |
| SYR SALTY  | argS | Arginine--tRNA ligase                                 | 4914400  |        |        |        | 1788400  | 1247400  | 1878600  |

|            |      |                                                              |          |         |         |         |         |         |         |
|------------|------|--------------------------------------------------------------|----------|---------|---------|---------|---------|---------|---------|
| SYS SALTY  | serS | Serine--tRNA ligase                                          | 626290   |         |         |         | 186980  | 167130  | 272180  |
| SYT SALTY  | thrS | Threonine--tRNA ligase                                       | 16772000 | 30311   | 16452   | 51111   | 6234100 | 4340000 | 6100000 |
| SYV SALTY  | valS | Valine--tRNA ligase                                          | 9042100  | 955110  | 917380  | 1256200 | 2370100 | 1680000 | 1863300 |
| YYY SALTY  | tyrS | Tyrosine--tRNA ligase                                        | 6412900  |         |         |         | 2328200 | 2689300 | 1395400 |
| T3MO SALTY | mod  | Type III restriction-modification system StyLTI enzyme mod   | 1433900  |         |         |         | 438390  | 303480  | 692060  |
| T3RE SALTY | res  | Type III restriction-modification system StyLTI enzyme res   | 343950   |         |         |         | 111540  | 92751   | 139660  |
| TALA SALTY | talA | Transaldolase A                                              | 8545400  | 3980.6  | 8060.2  | 8962    | 2150100 | 2372100 | 4002200 |
| TALB SALTY | talB | Transaldolase B                                              | 12723000 | 30404   | 20443   | 13593   | 3827400 | 4847500 | 3984000 |
| TAMA SALTS | tamA | Translocation and assembly module subunit TamA               | 570480   |         |         |         | 201330  | 172670  | 196490  |
| TAMB SALTS | tamB | Translocation and assembly module subunit TamB               | 99237    |         |         |         | 52578   | 27685   | 18975   |
| TDH SALTY  | tdh  | L-threonine 3-dehydrogenase                                  | 5081600  |         | 3252.8  |         | 2265200 | 1740900 | 1072300 |
| THIK SALTY | thiK | Thiamine kinase                                              |          |         |         |         |         |         |         |
| THIO SALTY | trxA | Thioredoxin 1                                                | 1321100  |         |         |         | 448470  | 452400  | 420260  |
| TIG SALTY  | tig  | Trigger factor                                               | 545880   | 26135   |         | 22720   | 191700  | 161960  | 143370  |
| TILS SALTY | tilS | tRNA(Ile)-lysidine synthase                                  | 81593    |         |         |         | 12806   | 33148   | 35639   |
| TOLB SALTY | tolB | Protein TolB                                                 | 773940   |         |         |         | 107650  | 101520  | 564770  |
| TOP1 SALTY | topA | DNA topoisomerase 1                                          | 1762800  |         |         |         | 797920  | 476800  | 488060  |
| TPIS SALTY | tpiA | Triosephosphate isomerase                                    | 20702000 | 7015600 | 5234200 | 17802   | 2078200 | 1819500 | 4536900 |
| TPX SALTY  | tpx  | Thiol peroxidase                                             | 7569400  |         |         |         | 2194700 | 2657200 | 2717500 |
| TRAT SALTM | traT | TraT complement resistance protein                           | 18035000 |         | 29806   |         | 5628600 | 6707300 | 5669100 |
| TREA SALTY | treA | Periplasmic trehalase                                        | 1439600  |         |         |         | 513040  | 406360  | 520200  |
| TREF SALTY | treF | Cytoplasmic trehalase                                        | 36312    |         |         |         | 12834   | 11628   | 11851   |
| TRER SALTY | treR | HTH-type transcriptional regulator TreR                      | 118380   |         | 23518   | 19580   | 24554   | 28259   | 22469   |
| TRPB SALTY | trpB | Tryptophan synthase beta chain                               | 324080   |         | 77428   | 73872   | 67086   | 52143   | 53547   |
| TRPE SALTY | trpE | Anthranilate synthase component 1                            | 1359100  | 424170  | 533920  | 401030  |         |         |         |
| TRUA SALTY | truA | tRNA pseudouridine synthase A                                | 264060   |         |         |         | 110460  | 69475   | 84119   |
| TRUD SALTY | truD | tRNA pseudouridine synthase D                                | 77723    |         |         |         |         | 38659   | 39063   |
| TSGA SALTY | tsgA | Protein TsgA                                                 | 159380   |         |         |         |         | 75758   | 83625   |
| TSX SALTY  | tsx  | Nucleoside-specific channel-forming protein Tsx              | 2153900  |         |         |         | 558440  | 720450  | 875050  |
| TYRB SALTY | tyrB | Aromatic-amino-acid aminotransferase                         | 639100   |         |         |         |         | 259100  | 379990  |
| TYRR SALTY | tyrR | Transcriptional regulatory protein TyrR                      | 3129100  |         |         |         | 1038700 | 1011900 | 1078500 |
| TYSY SALTY | thyA | Thymidylate synthase                                         | 2044200  |         |         |         | 795140  | 620660  | 628360  |
| UBIB SALTY | ubiB | Probable protein kinase UbiB                                 | 956560   |         |         |         | 423830  | 161550  | 371180  |
| UBID SALTY | ubiD | 3-octaprenyl-4-hydroxybenzoate carboxy-lyase                 | 2901300  | 722190  | 811690  | 667270  | 170690  | 53672   | 475820  |
| UBIE SALTY | ubiE | Ubiquinone/menaquinone biosynthesis C-methyltransferase UbiE | 85097    |         |         |         |         |         | 85097   |
| UCPA SALTY | ucpA | Oxidoreductase UcpA                                          | 1100500  |         |         |         | 261920  | 437000  | 401630  |
| UDP SALTY  | udp  | Uridine phosphorylase                                        | 21639000 | 255220  | 118820  | 266420  | 7516900 | 6151400 | 7330700 |
| UGPB SALTY | ugpB | sn-glycerol-3-phosphate-binding periplasmic protein UgpB     | 683020   |         |         |         | 250920  | 236690  | 195410  |
| UGPC SALTY | ugpC | sn-glycerol-3-phosphate import ATP-binding protein UgpC      | 181380   |         |         |         | 110080  | 71298   |         |

|             |      |                                                                |         |        |         |        |         |         |         |
|-------------|------|----------------------------------------------------------------|---------|--------|---------|--------|---------|---------|---------|
| UPP SALTY   | upp  | Uracil phosphoribosyltransferase                               | 272620  |        |         |        | 62830   |         | 209790  |
| USPA SALTY  | uspA | Universal stress protein A                                     | 7131400 | 12308  |         | 59419  | 1613100 | 3877100 | 1569400 |
| USPE SALTY  | uspE | Universal stress protein E                                     | 673080  |        |         |        | 169750  | 163540  | 339790  |
| USPF SALTY  | uspF | Universal stress protein F                                     | 1591400 |        |         |        | 13133   | 877040  | 701250  |
| USPG SALTY  | uspG | Universal stress protein G                                     | 1594100 |        | 42921   |        | 438500  | 426460  | 686180  |
| UVRA SALTY  | uvrA | UvrABC system protein A                                        | 1828100 |        |         |        | 764470  | 564600  | 499050  |
| UVRB SALTY  | uvrB | UvrABC system protein B                                        | 362320  |        |         |        | 86655   | 79886   | 195780  |
| UVRC SALTY  | uvrC | UvrABC system protein C                                        | 747110  |        |         |        | 275680  | 242200  | 229240  |
| UVRD SALTY  | uvrD | DNA helicase II                                                | 280530  |        |         |        | 79454   | 124790  | 76290   |
| UXAC SALTY  | uxaC | Uronate isomerase                                              | 929670  |        |         |        | 315980  | 282490  | 331200  |
| VIAA SALTY  | viaA | Protein ViaA                                                   |         |        |         |        |         |         |         |
| VIR17 SALTY |      | Virulence protein STM3117                                      |         |        |         |        |         |         |         |
| WECC SALTY  | wecC | UDP-N-acetyl-D-mannosamine dehydrogenase                       | 143350  | 11310  |         |        | 89946   |         | 42095   |
| WECF SALTY  | wecF | TDP-N-acetylfucosamine:lipid II N-acetylfucosaminyltransferase | 137280  |        |         |        | 50647   | 60080   | 26556   |
| WECG SALTY  | wecG | UDP-N-acetyl-D-mannosaminuronic acid transferase               | 914120  |        |         |        | 332310  | 285180  | 296620  |
| XGPT SALTY  | gpt  | Xanthine phosphoribosyltransferase                             | 399160  |        |         |        | 218280  |         | 180880  |
| YAEH SALTY  | yaeH | UPF0325 protein YaeH                                           | 6642500 |        | 43542   | 36595  | 1671300 | 1963500 | 2927600 |
| YBGS SALTY  | ybgS | Uncharacterized protein YbgS                                   | 8241400 |        |         |        | 2420300 | 2749700 | 3071400 |
| YBJQ SALTY  | ybjQ | UPF0145 protein YbjQ                                           | 3071900 | 947650 | 1021500 | 579080 | 161030  | 362670  |         |
| YCDX SALTY  | ycdX | Probable phosphatase YcdX                                      | 81045   |        |         |        | 26155   | 27236   | 27653   |
| YCFP SALTY  | ycfP | UPF0227 protein YcfP                                           | 1100200 |        |         |        | 248050  | 683850  | 168330  |
| YCGR SALTY  | ycgR | Flagellar brake protein YcgR                                   | 1273100 |        |         |        | 632860  | 321270  | 319010  |
| YCIA SALTY  | yciA | Acyl-CoA thioester hydrolase YciA                              | 265230  |        |         |        | 86551   | 91902   | 86782   |
| YCJF SALTY  | ycjF | UPF0283 membrane protein YcjF                                  | 1367200 |        |         |        | 318990  | 460750  | 587410  |
| YDIB SALTY  | ydiB | Quinate/shikimate dehydrogenase                                |         |        |         |        |         |         |         |
| YEAD SALTY  | yeaD | Putative glucose-6-phosphate 1-epimerase                       | 308650  |        |         |        | 72111   | 195520  | 41014   |
| YEAH SALTY  | yeaH | UPF0229 protein YeaH                                           | 2264900 |        |         |        | 953160  | 972600  | 339160  |
| YEEX SALTY  | yeeX | UPF0265 protein YeeX                                           | 192320  |        |         |        |         | 66776   | 125540  |
| YFBU SALTY  | yfbU | UPF0304 protein YfbU                                           | 5132200 |        | 71903   |        | 1016000 | 1877700 | 2166600 |
| YFCD SALTY  | yfcD | Uncharacterized Nudix hydrolase YfcD                           | 188140  |        |         |        | 58405   | 68994   | 60737   |
| YGFZ SALTY  | ygfZ | tRNA-modifying protein YgfZ                                    | 4176700 |        |         | 10847  | 1760600 | 1145500 | 1259900 |
| YIDC SALTY  | yidC | Membrane protein insertase YidC                                | 2083100 | 2648.1 | 6155    |        | 692540  | 617900  | 763870  |
| YIFL SALTY  | yifL | Uncharacterized lipoprotein YifL                               | 139470  | 19605  | 36683   | 47427  |         | 17805   | 17948   |
| YIIZ SALTY  | yiiZ | Uncharacterized protein YiiZ                                   | 133480  | 133480 |         |        |         |         |         |
| YBJJ SALTY  | ybjJ | UPF0337 protein YbjJ                                           | 1574000 |        |         |        | 564840  | 534600  | 474600  |
| YJHX SALTY  | yjhX | UPF0386 protein YjhX                                           | 175760  |        |         |        | 44232   | 87923   | 43601   |
| YQFB SALTY  | yqfB | UPF0267 protein YqfB                                           | 192930  |        |         |        | 35774   | 74175   | 82978   |
| ZAPB SALTY  | zapB | Cell division protein ZapB                                     | 976870  |        |         |        | 387560  | 334710  | 254610  |
| ZAPD SALTY  | zapD | Cell division protein ZapD                                     |         |        |         |        |         |         |         |

|            |      |                                         |        |       |  |  |        |        |        |
|------------|------|-----------------------------------------|--------|-------|--|--|--------|--------|--------|
| ZIPA_SALTY | zipA | Cell division protein ZipA              | 369350 | 11922 |  |  | 115980 | 120270 | 121180 |
| ZRAR_SALTY | zraR | Transcriptional regulatory protein ZraR | 55267  |       |  |  | 37103  | 18164  |        |
