# Supplementary material
Source: PubMed Central journal article supplement (PMC8276254)
Supplement: NIHMS1062475-supplement-sm2.pdf [file NIHMS1062475-supplement-sm2.pdf]

Table S2-3 *Salmonella* was labeled with the aminoxy probe, and then allowed to infect the macrophage for set intervals ranging from 15 min to 6 hours. After washing away the externally attached *Salmonella*, macrophage samples with different infection times were irradiated with 365 nm UV light for 10 min to covalently crosslink proteins. The irradiated cells were then harvested and lysed with lysis buffer, and NeutrAvidin beads were used to isolate the putative targets. Control (without UV radiation) was also performed in the same biological context tested. The proteins enriched by NeutrAvidin beads either from samples and controls were digested on-beads sequentially with Lys C and trypsin, and the resulting peptides were characterized and quantified by label-free LC-MS/MS. Raw MS files were analyzed by MaxQuant version 1.5.2 (<http://www.maxquant.org>). MS/MS spectra were searched by the Andromeda search engine using default parameter against the decoy SwissProt mouse database (Version March 2018, 16,957 entries).

| Column Name  | Comments                                                                                 |                                                                                                 |          |        |         |        |        |        |         |
|--------------|------------------------------------------------------------------------------------------|-------------------------------------------------------------------------------------------------|----------|--------|---------|--------|--------|--------|---------|
| ID           | Protein ID in UNIPROT database                                                           |                                                                                                 |          |        |         |        |        |        |         |
| GeneName     | Gene name in UNIPROT database                                                            |                                                                                                 |          |        |         |        |        |        |         |
| Description  | Protein name in UNIPROT database                                                         |                                                                                                 |          |        |         |        |        |        |         |
| iBAQ         | iBAQ value of identified proteins in all samples                                         |                                                                                                 |          |        |         |        |        |        |         |
| 6h-R1        | iBAQ value of identified proteins in 6 h sample, biological repeat 1, technique repeat 1 |                                                                                                 |          |        |         |        |        |        |         |
| 6h-R2        | iBAQ value of identified proteins in 6 h sample, biological repeat 1, technique repeat 2 |                                                                                                 |          |        |         |        |        |        |         |
| 6h-R3        | iBAQ value of identified proteins in 6 h sample, biological repeat 1, technique repeat 3 |                                                                                                 |          |        |         |        |        |        |         |
| 6h-R4        | iBAQ value of identified proteins in 6 h sample, biological repeat 2, technique repeat 1 |                                                                                                 |          |        |         |        |        |        |         |
| 6h-R5        | iBAQ value of identified proteins in 6 h sample, biological repeat 2, technique repeat 2 |                                                                                                 |          |        |         |        |        |        |         |
| 6h-R6        | iBAQ value of identified proteins in 6 h sample, biological repeat 2, technique repeat 3 |                                                                                                 |          |        |         |        |        |        |         |
| ID           | GeneName                                                                                 | Description                                                                                     | iBAQ     | 6h-R1  | 6h-R2   | 6h-R3  | 6h-R4  | 6h-R5  | 6h-R6   |
| 1433E MOUSE  | Ywhae                                                                                    | 14-3-3 protein epsilon;Short=14-3-3E;                                                           | 180000   | 45725  |         |        |        |        |         |
| ABCA7 MOUSE  | Absca7                                                                                   | ATP-binding cassette sub-family A member 7;                                                     | 194850   |        | 102930  |        | 53636  |        | 24672   |
| ACADL MOUSE  | Acadl                                                                                    | Long-chain specific acyl-CoA dehydrogenase, mitochondrial;Short=LCAD; (Precursor)               | 298700   | 15570  |         | 11223  | 24768  |        |         |
| ACIN1 MOUSE  | Acin1                                                                                    | Apoptotic chromatin condensation inducer in the nucleus;Short=Acinus;                           | 164530   | 18139  |         | 25305  | 23103  | 38466  | 57086   |
| ACTBL MOUSE  | Actbl2                                                                                   | Beta-actin-like protein 2;                                                                      | 18265000 |        | 5041200 |        |        |        | 3000200 |
| ALDH2 MOUSE  | Aldh2                                                                                    | Aldehyde dehydrogenase, mitochondrial; (Precursor)                                              | 9541100  | 259560 | 610810  | 139770 | 518810 | 270180 | 787640  |
| ALDR MOUSE   | Akr1b1                                                                                   | Aldose reductase;Short=AR;                                                                      | 426740   |        | 123770  | 35744  |        |        |         |
| AN32B MOUSE  | Anp32b                                                                                   | Acidic leucine-rich nuclear phosphoprotein 32 family member B;                                  | 1262500  |        | 240350  |        | 219370 | 214740 | 239000  |
| ANXA5 MOUSE  | Anxa5                                                                                    | Annexin A5;                                                                                     | 751340   | 238500 | 89112   | 243580 |        |        |         |
| AT1B3 MOUSE  | Atp1b3                                                                                   | Sodium/potassium-transporting ATPase subunit beta-3;                                            | 1157200  |        | 113030  |        |        |        |         |
| BCLF1 MOUSE  | Bclaf1                                                                                   | Bcl-2-associated transcription factor 1;Short=Btf;                                              | 187680   |        | 28018   |        | 11091  |        |         |
| BRX1 MOUSE   | Brix1                                                                                    | Ribosome biogenesis protein BRX1 homolog;                                                       | 702380   | 225970 | 84456   | 58170  |        | 196750 | 137040  |
| CIQP1 MOUSE  | C1qbp                                                                                    | Complement component 1 Q subcomponent-binding protein, mitochondrial; (Precursor)               | 664810   |        | 490480  |        |        |        |         |
| CITM MOUSE   | Mthfd11                                                                                  | Monofunctional C1-tetrahydrofolate synthase, mitochondrial; (Precursor)                         | 628470   | 44143  | 35346   | 39193  | 39794  | 53353  | 24650   |
| CALX MOUSE   | Canx                                                                                     | Calnexin;Flags: Precursor; (Precursor)                                                          | 315170   | 68040  | 54976   | 79047  |        |        |         |
| CH10 MOUSE   | Hspe1                                                                                    | 10 kDa heat shock protein, mitochondrial;Short=Hsp10;                                           | 861780   | 100610 | 156090  | 128500 |        |        |         |
| CHD4 MOUSE   | Chd4                                                                                     | Chromodomain-helicase-DNA-binding protein 4;Short=CHD-4;                                        | 236910   |        |         | 15296  | 22168  | 29637  | 33474   |
| CLIC1 MOUSE  | Clic1                                                                                    | Chloride intracellular channel protein 1;                                                       | 768180   | 126910 | 76725   | 365370 |        |        |         |
| K1C19 MOUSE  | Krt19                                                                                    | Keratin, type 1 cytoskeletal 19;                                                                | 288440   |        |         |        | 288440 |        |         |
| CY24B MOUSE  | Cybb                                                                                     | Cytochrome b-245 heavy chain;                                                                   | 78043    |        |         |        |        |        | 11472   |
| DDX3X MOUSE  | Ddx3x                                                                                    | ATP-dependent RNA helicase DDX3X;                                                               | 165030   |        |         |        |        |        | 10927   |
| DDX46 MOUSE  | Ddx46                                                                                    | Probable ATP-dependent RNA helicase DDX46;                                                      | 277510   | 34794  | 16552   | 55953  | 74714  |        |         |
| DNMT1 MOUSE  | Dnmt1                                                                                    | DNA (cytosine-5)-methyltransferase 1;Short=Dnmt1;Short=Met-1;                                   | 94644    | 20160  | 6903.8  | 16849  | 30139  |        |         |
| DSG1A MOUSE  | Dsg1a                                                                                    | Desmoglein-1-alpha;Short=Desmoglein-1;Short=Dsg1-alpha; (Precursor)                             | 1164200  | 20666  | 27054   | 42090  | 74719  | 89712  | 85245   |
| EF1D MOUSE   | Eef1d                                                                                    | Elongation factor 1-delta;Short=EF-1-delta;                                                     | 61620    |        |         | 46051  |        |        |         |
| EFHD2 MOUSE  | Efh2d2                                                                                   | EF-hand domain-containing protein D2;                                                           | 168990   | 40038  | 94957   | 33998  |        |        |         |
| ENV1 MOUSE   | N/A                                                                                      | MLV-related proviral Env polyprotein;Contains:RecName: Full=Surface protein;Short=SU;Con        | 141060   |        |         | 56560  |        |        |         |
| ESTD MOUSE   | Esd                                                                                      | S-formylglutathione hydrolase;Short=FGH;                                                        | 470840   |        | 87440   | 100250 |        |        |         |
| ETFA MOUSE   | Etfaf                                                                                    | Electron transfer flavoprotein subunit alpha, mitochondrial;Short=Alpha-ETF;Flags: Precursor; ( | 320870   | 29489  | 33483   | 26813  |        |        |         |
| FADS1 MOUSE  | Fads1                                                                                    | Fatty acid desaturase 1;                                                                        | 724390   |        | 111710  |        | 179070 | 116830 | 192280  |
| FBL1L1 MOUSE | Fbl1l1                                                                                   | rRNA/rDNA 2'-O-methyltransferase fibrillar-like protein 1;                                      | 530030   |        |         |        | 145700 | 192130 | 124710  |
| FINC MOUSE   | Fnl1                                                                                     | Fibronectin;Short=FN;Contains:RecName: Full=Anastellin;Flags: Precursor; (Precursor)            | 84555    |        |         |        | 4774.4 | 4698.5 | 6102.9  |
| FUBP2 MOUSE  | Khsrp                                                                                    | Far upstream element-binding protein 2;Short=FUSE-binding protein 2;                            | 67419    |        |         |        |        | 23641  |         |
| FUS MOUSE    | Fus                                                                                      | RNA-binding protein FUS;                                                                        | 335460   | 64503  | 108060  | 131190 |        |        |         |
| G6PI MOUSE   | Gpi                                                                                      | Glucose-6-phosphate isomerase;Short=GPI;                                                        | 848260   | 146750 | 101680  | 284320 |        |        |         |
| GBB1 MOUSE   | Gnb1                                                                                     | Guanine nucleotide-binding protein G(I)/G(S)/G(T) subunit beta-1;                               | 603810   |        | 85297   |        |        |        |         |
| GDIR2 MOUSE  | Arhgdib                                                                                  | Rho GDP-dissociation inhibitor 2;Short=Rho GDI 2;                                               | 126330   |        | 73644   |        |        |        |         |
| GLSK MOUSE   | Gls                                                                                      | Glutaminase kidney isoform, mitochondrial;Short=GLS; (Precursor)                                | 372740   | 57019  | 32933   | 79819  |        | 9112.3 | 16188   |
| GNL3 MOUSE   | Gnl3                                                                                     | Guanine nucleotide-binding protein-like 3;                                                      | 124780   | 28137  | 35114   |        |        |        |         |
| H10 MOUSE    | H1f0                                                                                     | Histone H1.0;                                                                                   | 3903000  | 643680 | 717680  | 638630 | 296090 | 366120 | 758440  |
| H2AY MOUSE   | H2afy                                                                                    | Core histone macro-H2A.1;Short=Histone macroH2A1;Short=mH2A1;                                   | 1973600  | 240640 | 86596   |        | 139070 | 289080 | 220220  |
| HCLS1 MOUSE  | Hcls1                                                                                    | Hematopoietic lineage cell-specific protein;                                                    | 49362    |        | 26112   |        | 23250  |        |         |
| HDAC1 MOUSE  | Hdac1                                                                                    | Histone deacetylase 1;Short=HD1;                                                                | 114880   |        | 16149   |        |        |        |         |
| HINT1 MOUSE  | Hint1                                                                                    | Histidine triad nucleotide-binding protein 1;                                                   | 543560   | 212830 | 207490  |        |        |        |         |
| HNRPC MOUSE  | Hnrnpc                                                                                   | Heterogeneous nuclear ribonucleoproteins C1/C2;Short=hnRNP C1/C2;                               | 805310   | 134740 | 190180  | 54230  |        |        |         |
| HNRPD MOUSE  | Hnrmpd                                                                                   | Heterogeneous nuclear ribonucleoprotein D0;Short=hnRNP D0;                                      | 541070   | 153110 |         | 224370 |        |        |         |
| HNRPQ MOUSE  | Syncrmp                                                                                  | Heterogeneous nuclear ribonucleoprotein Q;Short=hnRNP Q;                                        | 577780   |        |         |        |        |        | 70267   |
| HPIB3 MOUSE  | Hp1bp3                                                                                   | Heterochromatin protein 1-binding protein 3;                                                    | 1357500  | 144260 | 118510  | 100370 | 466250 | 237300 | 74889   |
| HPT MOUSE    | Hp                                                                                       | Haptoglobin; (Precursor)                                                                        | 205080   |        |         | 79677  |        |        |         |
| HS90A MOUSE  | Hsp90aa1                                                                                 | Heat shock protein HSP 90-alpha;                                                                | 901360   | 115170 | 98113   | 139630 |        |        |         |
| HSP74 MOUSE  | Hspa4                                                                                    | Heat shock 70 kDa protein 4;                                                                    | 147940   | 7461.2 | 14271   |        |        |        |         |
| IDHG1 MOUSE  | Idh3g                                                                                    | Isocitrate dehydrogenase [NAD] subunit gamma 1, mitochondrial; (Precursor)                      | 277760   |        | 48679   |        |        |        | 117750  |
| IDHP MOUSE   | Idh2                                                                                     | Isocitrate dehydrogenase [NADP], mitochondrial;Short=IDH; (Precursor)                           | 937570   | 10361  |         | 111730 |        |        | 95630   |
| KHDR1 MOUSE  | Khdrb1                                                                                   | KH domain-containing, RNA-binding, signal transduction-associated protein 1;                    | 2262100  | 383650 | 506960  |        |        | 280260 | 364040  |
| LA MOUSE     | Ssb                                                                                      | Lupus La protein homolog;                                                                       | 55629    |        |         |        |        |        | 7730.3  |
| LAMP1 MOUSE  | Lamp1                                                                                    | Lysosome-associated membrane glycoprotein 1;Short=LAMP-1;Short=Lysosome-associated me           | 307410   |        |         |        | 48432  |        |         |
| LAP2B MOUSE  | Tmpo                                                                                     | Lamina-associated polypeptide 2, isoforms beta/delta/epsilon/gamma;                             | 678170   | 41737  | 142580  | 117860 | 110150 | 91198  | 96375   |
| LCAP MOUSE   | Lnpep                                                                                    | Leucyl-cystinyl aminopeptidase;Short=Cystinyl aminopeptidase;                                   | 395160   |        |         | 19743  | 26388  |        |         |
| LIMN1 MOUSE  | Limn1                                                                                    | Lamin-B1;Flags: Precursor; (Precursor)                                                          | 54185    |        | 4393.1  |        |        |        |         |
| LPPRC MOUSE  | Lpprc                                                                                    | Leucine-rich PPR motif-containing protein, mitochondrial; (Precursor)                           | 187830   | 10728  | 15581   |        | 7742.8 | 10220  |         |
| MACF1 MOUSE  | Macf1                                                                                    | Microtubule-actin cross-linking factor 1;                                                       | 42752    | 5142.8 |         | 463.11 | 2294.4 |        | 2047.5  |
| MYCB2 MOUSE  | Mycbp2                                                                                   | E3 ubiquitin-protein ligase MYCBP2;                                                             | 695820   | 132260 | 157990  | 8526.6 |        |        | 359580  |
| MYL6 MOUSE   | Myl6                                                                                     | Myosin light polypeptide 6;                                                                     | 688350   | 118570 |         |        |        |        |         |
| NACA MOUSE   | Naca                                                                                     | Nascent polypeptide-associated complex subunit alpha;                                           | 1278400  |        | 356140  | 122840 |        |        |         |
| NAT10 MOUSE  | Nat10                                                                                    | RNA cytidine acetyltransferase {ECO:0000255}HAMAP-Rule:MF_032111};                              | 52232    |        |         | 9662.8 |        |        |         |
| NOLC1 MOUSE  | Nolc1                                                                                    | Nucleolar and coiled-body phosphoprotein 1 {ECO:0000305};                                       | 1610100  | 156230 | 297540  | 215780 | 275570 | 259020 | 305780  |
| NOP2 MOUSE   | Nop2                                                                                     | Probable 28S rRNA (cytosine-C-5)-methyltransferase;                                             | 2263100  | 250700 | 279100  | 208670 | 495780 | 295490 | 396980  |
| NOP56 MOUSE  | Nop56                                                                                    | Nucleolar protein 56;                                                                           | 502180   | 31573  | 31996   |        |        | 61890  |         |
| NP1L1 MOUSE  | Nap1l1                                                                                   | Nucleosome assembly protein 1-like 1; (Precursor)                                               | 513720   | 229080 |         | 162370 |        |        |         |
| OAT MOUSE    | Oat                                                                                      | Ornithine aminotransferase, mitochondrial; (Precursor)                                          | 600030   | 38060  |         |        |        |        |         |
| ODP2 MOUSE   | Dlat                                                                                     | Dihydrolipoyllysine-residue acetyltransferase component of pyruvate dehydrogenase complex, r    | 83990    |        |         | 41531  |        |        |         |
| ODPX MOUSE   | Pdhx                                                                                     | Pyruvate dehydrogenase protein X component, mitochondrial; (Precursor)                          | 45773    | 8909   |         |        |        |        |         |
| PA2G4 MOUSE  | Pa2g4                                                                                    | Proliferation-associated protein 2G4;                                                           | 778350   |        | 119690  | 48499  |        |        |         |
| PAIRB MOUSE  | Serbp1                                                                                   | Plasminogen activator inhibitor 1 RNA-binding protein;                                          | 331560   | 31955  | 28152   | 82501  | 73469  |        | 51203   |
| PARP1 MOUSE  | Parp1                                                                                    | Poly [ADP-ribose] polymerase 1;Short=PARP-1;                                                    | 23282    | 17119  |         |        |        |        |         |
| PCNA MOUSE   | Pcna                                                                                     | Proliferating cell nuclear antigen;Short=PCNA;                                                  | 201480   | 45064  | 80133   | 76278  |        |        |         |
| PDIA4 MOUSE  | Pdia4                                                                                    | Protein disulfide-isomerase A4; (Precursor)                                                     | 35590    |        | 19115   |        |        |        |         |
| PDIA6 MOUSE  | Pdia6                                                                                    | Protein disulfide-isomerase A6; (Precursor)                                                     | 1039400  | 328940 | 178160  | 214560 |        |        |         |
| PGAM1 MOUSE  | Pgam1                                                                                    | Phosphoglycerate mutase 1;                                                                      | 2200600  | 408520 | 414380  | 346060 | 117250 |        | 113200  |
| PHB2 MOUSE   | Phb2                                                                                     | Prohibitin-2;                                                                                   | 229540   |        |         | 69152  |        |        |         |
| PININ MOUSE  | Pnin                                                                                     | Pinin;                                                                                          | 518760   | 38985  | 51525   | 71662  | 82713  |        | 74647   |
| PKP1 MOUSE   | Pkpl                                                                                     | Plakophilin-1;                                                                                  | 1028300  | 16527  | 15440   |        | 52987  | 48550  | 96415   |
| PPGB MOUSE   | Ctsa                                                                                     | Lysosomal protective protein; (Precursor)                                                       | 378690   |        | 55251   |        |        |        |         |
| PPIB MOUSE   | Ppib                                                                                     | Peptidyl-prolyl cis-trans isomerase B;Short=PPIase B; (Precursor)                               | 606880   | 82669  | 168330  |        |        |        |         |

|             |         |                                                                                            |         |        |         |         |         |         |         |
|-------------|---------|--------------------------------------------------------------------------------------------|---------|--------|---------|---------|---------|---------|---------|
| PR38B_MOUSE | Prpf38b | Pre-mRNA-splicing factor 38B;                                                              | 233540  |        | 38870   | 32991   | 50945   |         | 62330   |
| PRDX4_MOUSE | Prdx4   | Peroxioredoxin-4; (Precursor)                                                              | 505930  |        | 109290  | 185090  |         |         |         |
| PRDX6_MOUSE | Prdx6   | Peroxioredoxin-6;                                                                          | 270660  | 75794  | 93674   | 82867   |         |         |         |
| PSB1_MOUSE  | Psmb1   | Proteasome subunit beta type-1; (Precursor)                                                | 343450  |        |         |         |         |         | 68255   |
| PSMD2_MOUSE | Psm2    | 26S proteasome non-ATPase regulatory subunit 2;                                            | 29695   |        | 2255.8  |         |         |         |         |
| QCR2_MOUSE  | Uqcr2   | Cytochrome b-c1 complex subunit 2, mitochondrial; (Precursor)                              | 595360  |        | 211520  |         | 64787   |         |         |
| RMXL1_MOUSE | Rbmx1   | RNA binding motif protein, X-linked-like-1;                                                | 203660  |        | 40367   | 47341   | 35601   | 33528   | 30685   |
| RL1D1_MOUSE | Rsl1d1  | Ribosomal L1 domain-containing protein 1;                                                  | 9443600 | 788080 | 1385600 | 1360400 | 1799500 | 1888300 | 1220700 |
| RL22_MOUSE  | Rpl22   | 60S ribosomal protein L22;                                                                 | 3735500 | 577480 | 755770  | 538780  |         |         |         |
| RL38_MOUSE  | Rpl38   | 60S ribosomal protein L38;                                                                 | 2412700 |        | 786730  |         |         | 506830  |         |
| RLA0_MOUSE  | Rplp0   | 60S acidic ribosomal protein P0;                                                           | 898860  | 140230 | 141710  | 255670  |         |         |         |
| RNPS1_MOUSE | Rnps1   | RNA-binding protein with serine-rich domain 1;                                             | 703920  |        |         |         | 144130  |         |         |
| ROA0_MOUSE  | Hnmpa0  | Heterogeneous nuclear ribonucleoprotein A0;Short=hnRNP A0;                                 | 2115800 | 255460 | 238830  | 334050  |         |         | 327410  |
| ROA1_MOUSE  | Hnmpa1  | Heterogeneous nuclear ribonucleoprotein A1;Short=hnRNP A1;                                 | 1186700 | 132810 | 135440  | 362090  | 7437.3  | 106740  | 107910  |
| ROAA_MOUSE  | Hnmpab  | Heterogeneous nuclear ribonucleoprotein A/B;Short=hnRNP A/B;                               | 3259900 | 431420 | 533440  | 682740  | 304540  | 294530  | 40417   |
| RPF2_MOUSE  | Rpf2    | Ribosome production factor 2 homolog;                                                      | 1082900 | 50502  | 166040  | 60195   | 232060  |         | 145500  |
| RRP12_MOUSE | Rrp12   | RRP12-like protein;                                                                        | 30908   |        |         |         |         |         | 8069.3  |
| RS18_MOUSE  | Rps18   | 40S ribosomal protein S18;                                                                 | 882200  | 65007  | 235050  |         |         |         |         |
| RS28_MOUSE  | Rps28   | 40S ribosomal protein S28;                                                                 | 2610600 |        | 1171800 |         |         |         |         |
| RS5_MOUSE   | Rps5    | 40S ribosomal protein S5;Contains:RecName: Full=40S ribosomal protein S5, N-terminally pro | 329630  | 73048  | 66514   |         |         |         |         |
| RS7_MOUSE   | Rps7    | 40S ribosomal protein S7;                                                                  | 1724300 | 539620 | 535180  | 373830  |         |         |         |
| RS9_MOUSE   | Rps9    | 40S ribosomal protein S9;                                                                  | 702000  | 93042  |         | 263940  |         |         | 129620  |
| RSSA_MOUSE  | Rpsa    | 40S ribosomal protein SA {ECO:0000255}HAMAP-Rule:MF_03016};                                | 931530  | 172880 | 281580  | 116910  |         |         |         |
| SC61B_MOUSE | Sec61b  | Protein transport protein Sec61 subunit beta;                                              | 752700  | 130010 | 126810  | 158550  |         | 164560  |         |
| SERA_MOUSE  | Phgdh   | D-3-phosphoglycerate dehydrogenase;Short=3-PGDH;                                           | 973300  | 34366  |         | 52423   |         |         |         |
| SET_MOUSE   | Set     | Protein SET;                                                                               | 323340  |        |         | 151960  |         |         |         |
| SF3A1_MOUSE | Sf3a1   | Splicing factor 3A subunit 1;                                                              | 43917   | 6047.1 | 9412.6  | 9326.4  | 5700.4  | 7988.4  |         |
| SF3B1_MOUSE | Sf3b1   | Splicing factor 3B subunit 1;                                                              | 19245   |        |         |         |         | 3635.9  |         |
| SFPQ_MOUSE  | Sfpq    | Splicing factor, proline- and glutamine-rich;                                              | 465980  |        | 111400  | 109790  |         |         | 21687   |
| SMD2_MOUSE  | Snrpd2  | Small nuclear ribonucleoprotein Sm D2;Short=Sm-D2;                                         | 2147500 | 249080 | 298970  | 429780  | 341810  |         | 300310  |
| SMD3_MOUSE  | Snrpd3  | Small nuclear ribonucleoprotein Sm D3;Short=Sm-D3;                                         | 2019900 | 330250 | 228490  |         | 264670  | 243920  | 118260  |
| SOAT1_MOUSE | Soat1   | Sterol O-acyltransferase 1;                                                                | 121070  |        |         |         |         |         | 31524   |
| SODM_MOUSE  | Sod2    | Superoxide dismutase [Mn], mitochondrial; (Precursor)                                      | 238840  | 55000  | 72620   | 62399   |         |         |         |
| SR140_MOUSE | U2surp  | U2 snRNP-associated SURP motif-containing protein;                                         | 297920  | 36315  |         | 19292   | 17198   | 12821   | 68262   |
| STOM_MOUSE  | Stom    | Erythrocyte band 7 integral membrane protein;                                              | 457300  |        | 355990  |         |         |         |         |
| SYEP_MOUSE  | Eprs    | Bifunctional glutamate/proline-tRNA ligase;                                                | 52975   |        | 3937.4  | 4425.1  |         |         |         |
| TADBP_MOUSE | Tardbp  | TAR DNA-binding protein 43;Short=TDP-43;                                                   | 917650  |        |         | 45622   |         |         |         |
| TCPG_MOUSE  | Cct3    | T-complex protein 1 subunit gamma;Short=TCP-1-gamma;                                       | 264250  | 18789  | 23175   | 24637   |         |         |         |
| TCPH_MOUSE  | Cct7    | T-complex protein 1 subunit eta;Short=TCP-1-eta;                                           | 326410  | 33709  |         |         |         |         |         |
| TECR_MOUSE  | Tecr    | Very-long-chain enoyl-CoA reductase {ECO:0000305};                                         | 249670  |        |         |         | 115510  |         | 60304   |
| TFR1_MOUSE  | Tfrc    | Transferrin receptor protein 1;Short=TR;Short=TfR;Short=TfR1;Short=Trfr;AltName: CD anti   | 131800  |        | 29671   | 17713   | 20379   | 17046   | 20503   |
| TITIN_MOUSE | Tin     | Titin;                                                                                     | 10060   |        |         |         | 1289.6  |         | 1829.9  |
| TOP1_MOUSE  | Top1    | DNA topoisomerase 1;                                                                       | 671300  | 40939  | 82549   | 111860  | 105060  | 109440  | 135960  |
| TOP2A_MOUSE | Top2a   | DNA topoisomerase 2-alpha;                                                                 | 122630  |        |         |         |         |         | 14960   |
| TPM3_MOUSE  | Tpm3    | Tropomyosin alpha-3 chain;                                                                 | 446220  | 61930  | 94407   | 75611   |         |         |         |
| TPX2_MOUSE  | Tpx2    | Targeting protein for Xklp2;                                                               | 33585   | 12660  | 20925   |         |         |         |         |
| TR150_MOUSE | Thrap3  | Thyroid hormone receptor-associated protein 3;                                             | 136250  | 9561.8 |         |         | 22813   |         |         |
| TRAP1_MOUSE | Trap1   | Heat shock protein 75 kDa, mitochondrial;Short=HSP 75; (Precursor)                         | 494930  |        |         | 45290   |         |         |         |
| UT14A_MOUSE | Utp14a  | U3 small nucleolar RNA-associated protein 14 homolog A;                                    | 47649   | 14752  |         | 32898   |         |         |         |
| VAPA_MOUSE  | Vapa    | Vesicle-associated membrane protein-associated protein A;Short=VAMP-A;Short=VAMP-asso      | 272430  | 30424  | 32755   | 117480  |         |         |         |
| YBOX1_MOUSE | Ybx1    | Nuclease-sensitive element-binding protein 1;                                              | 76633   |        | 70493   |         |         |         |         |
| ZCH18_MOUSE | Zc3h18  | Zinc finger CCCH domain-containing protein 18;                                             | 16252   | 7513.6 |         |         | 8738.8  |         |         |
