# Supplementary material
Source: PubMed Central journal article supplement (PMC8276254)
Supplement: NIHMS1062475-supplement-sm3.pdf [file NIHMS1062475-supplement-sm3.pdf]

*Salmonella* was labeled with the aminoxy probe, and then allowed to infect the macrophage for set intervals ranging from 15 min to 6 hours. After washing away the externally attached *Salmonella*, macrophage samples with different infection times were irradiated with 365 nm UV light for 10 min to covalently crosslink proteins. The irradiated cells were then harvested and lysed with lysis buffer, and NeutrAvidin beads were used to isolate the putative targets. Control (without UV radiation) was also performed in the same biological context tested. The proteins enriched by NeutrAvidin beads either from samples and controls were digested on-beads sequentially with Lys C and trypsin, and the resulting peptides were characterized and quantified by label-free LC-MS/MS. Raw MS files were analyzed by MaxQuant version 1.5.2 (<http://www.maxquant.org>). MS/MS spectra were searched by the Andromeda search engine using default parameter against the decoy SwissProt *Salmonella typhimurium* database (Version March 2018, 1916 entries). Proteins specifically identified the UV samples were listed.

| Column Name | Comments                         |                                                                        |
|-------------|----------------------------------|------------------------------------------------------------------------|
| ID          | Protein ID in UNIPROT database   |                                                                        |
| GeneName    | Gene name in UNIPROT database    |                                                                        |
| Description | Protein name in UNIPROT database |                                                                        |
| ID          | GeneName                         | Description                                                            |
| ACKA_SALTY  | ackA                             | Acetate kinase                                                         |
| AHPF_SALTY  | ahpF                             | Alkyl hydroperoxide reductase subunit F;                               |
| BGLX_SALTY  | bglX                             | Periplasmic beta-glucosidase; (Precursor)                              |
| CH60_SALTY  | groL                             | 60 kDa chaperonin                                                      |
| CLPB_SALTY  | clpB                             | Chaperone protein ClpB;                                                |
| CRP_SALTY   | crp                              | cAMP-activated global transcriptional regulator CRP;                   |
| CSPA_SALTY  | cspA                             | Cold shock protein CspA;Short=CSP-A;                                   |
| CYSK_SALTY  | cysK                             | Cysteine synthase A;Short=CSase A;                                     |
| DBHA_SALTY  | hupA                             | DNA-binding protein HU-alpha;                                          |
| DBHB_SALTY  | hupB                             | DNA-binding protein HU-beta;                                           |
| DEGP_SALTY  | degP                             | Periplasmic serine endoprotease DegP; (Precursor)                      |
| DGAL_SALTY  | mgIB                             | D-galactose-binding periplasmic protein;Short=GBP; (Precursor)         |
| DNAJ_SALTY  | dnaJ                             | Chaperone protein DnaJ                                                 |
| DPS_SALTY   | dps                              | DNA protection during starvation protein                               |
| EFG_SALTY   | fusA                             | Elongation factor G;Short=EF-G;                                        |
| ENO_SALTY   | eno                              | Enolase                                                                |
| FABA_SALTY  | fabA                             | 3-hydroxydecanoyl-[acyl-carrier-protein] dehydratase                   |
| FABG_SALTY  | fabG                             | 3-oxoacyl-[acyl-carrier-protein] reductase FabG;                       |
| HNS_SALTY   | hns                              | DNA-binding protein H-NS                                               |
| HSLU_SALTY  | hslU                             | ATP-dependent protease ATPase subunit HslU                             |
| IF3_SALTY   | infC                             | Translation initiation factor IF-3                                     |
| KPYK2_SALTY | pykA                             | Pyruvate kinase II;                                                    |
| LRP_SALTY   | lrp                              | Leucine-responsive regulatory protein.                                 |
| MDH_SALTY   | mdh                              | Malate dehydrogenase                                                   |
| MDTA_SALTY  | mdtA                             | Multidrug resistance protein MdtA                                      |
| NUSG_SALTY  | nusG                             | Transcription termination/antitermination protein NusG                 |
| OPPA_SALTY  | oppA                             | Periplasmic oligopeptide-binding protein;Flags: Precursor; (Precursor) |
| PRC_SALTY   | prc                              | Tail-specific protease; (Precursor)                                    |
| PTA_SALTY   | pta                              | Phosphate acetyltransferase;                                           |
| PTHP_SALTY  | ptsH                             | Phosphocarrier protein HPr;                                            |
| RBFA_SALTY  | rbfA                             | Ribosome-binding factor A                                              |
| RCSB_SALTY  | rcsB                             | Transcriptional regulatory protein RcsB                                |
| RIDA_SALTY  | ridA                             | 2-iminobutanoate/2-iminopropanoate deaminase.                          |
| RL1_SALTY   | rplA                             | 50S ribosomal protein L1                                               |
| RL10_SALTY  | rplJ                             | 50S ribosomal protein L10;                                             |
| RL11_SALTY  | rplK                             | 50S ribosomal protein L11                                              |
| RL15_SALTY  | rplO                             | 50S ribosomal protein L15                                              |
| RL18_SALTY  | rplR                             | 50S ribosomal protein L18                                              |
| RL22_SALTY  | rplV                             | 50S ribosomal protein L22                                              |
| RL5_SALTY   | rplE                             | 50S ribosomal protein L5                                               |
| RL6_SALTY   | rplF                             | 50S ribosomal protein L6                                               |
| RL9_SALTY   | rplI                             | 50S ribosomal protein L9                                               |
| RLUF_SALTY  | rluF                             | 23S rRNA pseudouridine(2604) synthase                                  |
| RNB_SALTY   | rnb                              | Exoribonuclease 2                                                      |
| RRF_SALTY   | frr                              | Ribosome-recycling factor                                              |
| RS2_SALTY   | rpsB                             | 30S ribosomal protein S2                                               |
| RS3_SALTY   | rpsC                             | 30S ribosomal protein S3;                                              |
| RS4_SALTY   | rpsD                             | 30S ribosomal protein S4;                                              |
| RS5_SALTY   | rpsE                             | 30S ribosomal protein S5;                                              |
| RS8_SALTY   | rpsH                             | 30S ribosomal protein S8;                                              |
| RUVA_SALTY  | ruvA                             | Holliday junction ATP-dependent DNA helicase RuvA                      |
| SEQA_SALTY  | seqA                             | Negative modulator of initiation of replicator                         |
| SKP_SALTY   | skp                              | Chaperone protein Skp; (Precursor)                                     |
| SODM_SALTY  | sodA                             | Superoxide dismutase [Mn];                                             |
| SURA_SALTY  | surA                             | Chaperone SurA                                                         |
| SYFA_SALTY  | pheS                             | Phenylalanine--tRNA ligase alpha subunit                               |

|            |      |                                                                                       |
|------------|------|---------------------------------------------------------------------------------------|
| SYGB_SALTY | glyS | Glycine--tRNA ligase beta subunit                                                     |
| TIG_SALTY  | tig  | Trigger factor                                                                        |
| UGPB_SALTY | ugpB | sn-glycerol-3-phosphate-binding periplasmic protein UgpB;Flags: Precursor; (Precursor |
| YAEH_SALTY | yaeH | UPF0325 protein YaeH                                                                  |
| YAJQ_SALTY | yajQ | UPF0234 protein YajQ                                                                  |
| YNCE_SALTY | yncE | Uncharacterized protein YncE;Flags: Precursor; (Precursor                             |
| FLID_SALTY | fliD | Flagellar hook-associated protein 2;Short=HAP2;                                       |
| STEA_SALTY | steA | Secreted effector protein SteA;                                                       |
| AHPC_SALTY | ahpC | Alkyl hydroperoxide reductase C                                                       |
| ATPB_SALTY | atpD | ATP synthase subunit beta                                                             |
| CBIH_SALTY | cbiH | Probable cobalt-factor III C(17)-methyltransferase                                    |
| CHEA_SALTY | cheA | Chemotaxis protein CheA;                                                              |
| CISY_SALTY | gltA | Citrate synthase;                                                                     |
| CYSG_SALTY | cysG | Siroheme synthase                                                                     |
| GLTI_SALTY | gltI | Glutamate/aspartate import solute-binding proteir                                     |
| NRDD_SALTY | nrdD | Anaerobic ribonucleoside-triphosphate reductase                                       |
| POTD_SALTY | potD | Spermidine/putrescine-binding periplasmic protein;Short=SPBP;Flags: Precursor; (Precu |
| SIGE_SALTY | sigE | Chaperone protein SigE;                                                               |
| SIPD_SALTY | sipD | Cell invasion protein SipD;                                                           |
| SLYB_SALTY | slyB | Outer membrane lipoprotein SlyB;Flags: Precursor; (Precursor                          |
| SOPD_SALTY | sopD | Secreted effector protein SopD;                                                       |
| SSEA_SALTY | sseA | Type III secretion system chaperone SseA;Short=TTSS chaperone SseA                    |
| TPX_SALTY  | tpx  | Thiol peroxidase                                                                      |



rsor
